# Supplementary material for: Analyzing Injury Patterns in Climbing: A Comprehensive Study of Risk Factors
Source: MDPI journal article supplement (doi:10.3390/sports12020061), 2024-02-19
Supplement: s1 [file s1]

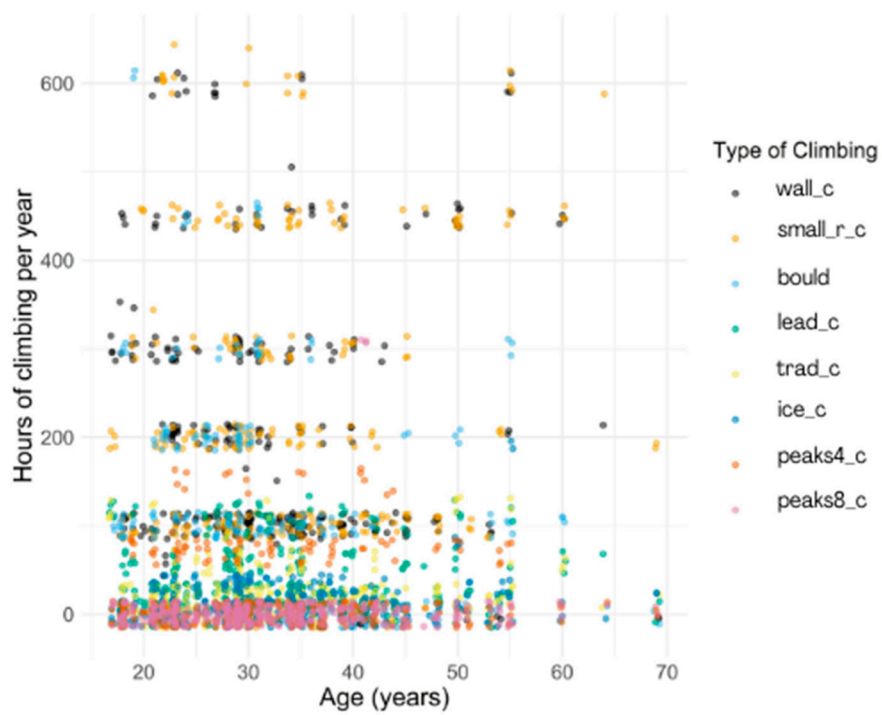

(a)

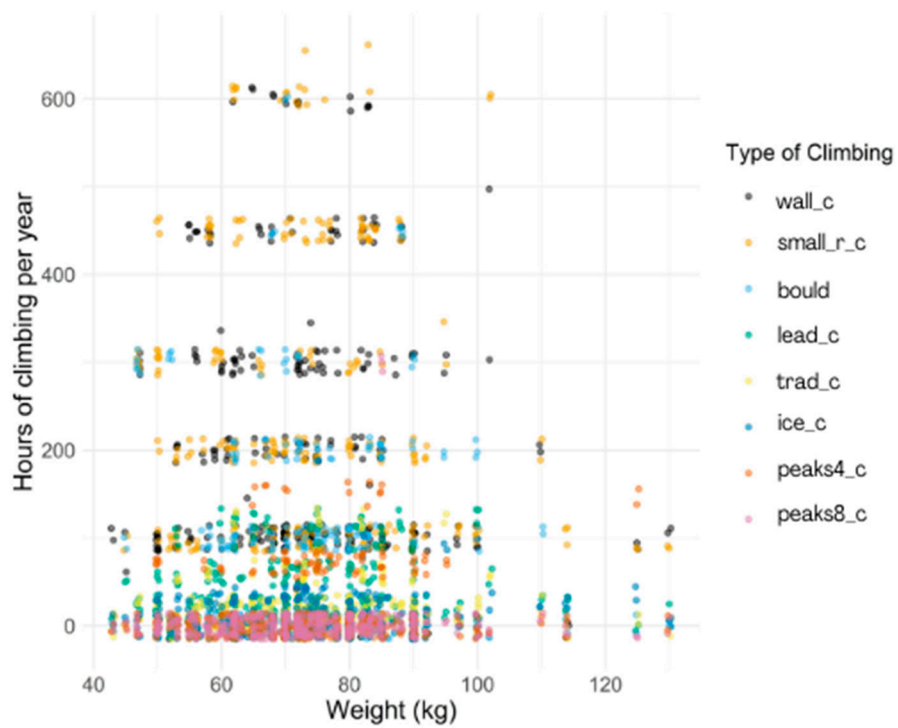

(b)

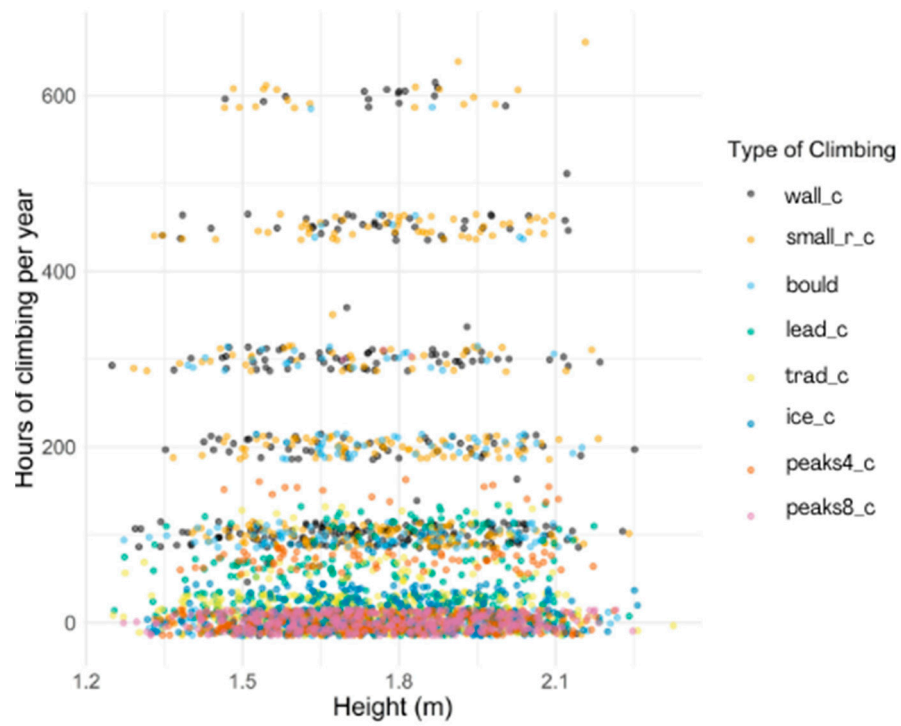

(c)

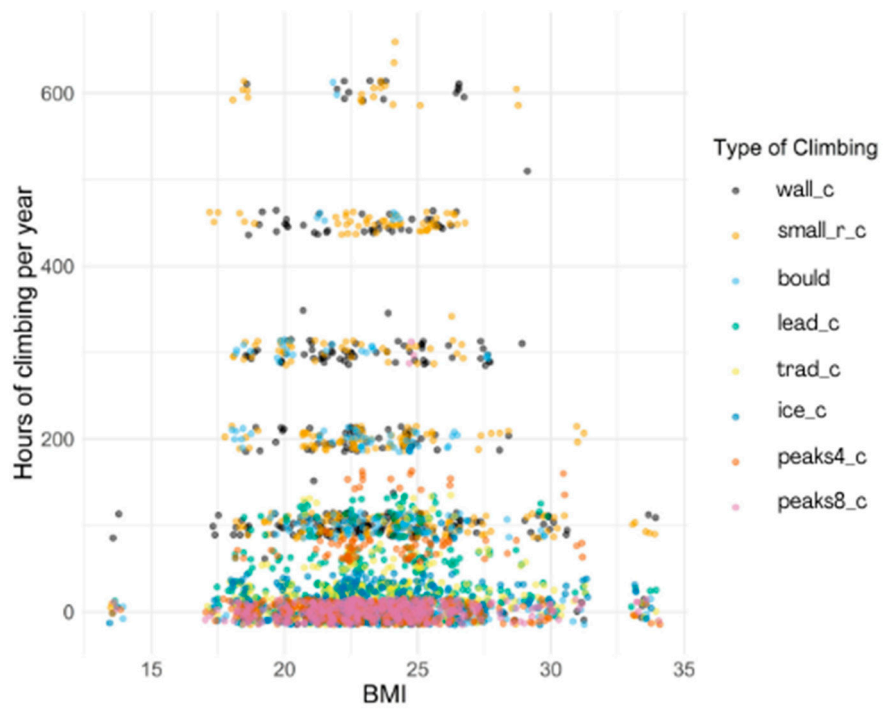

(d)

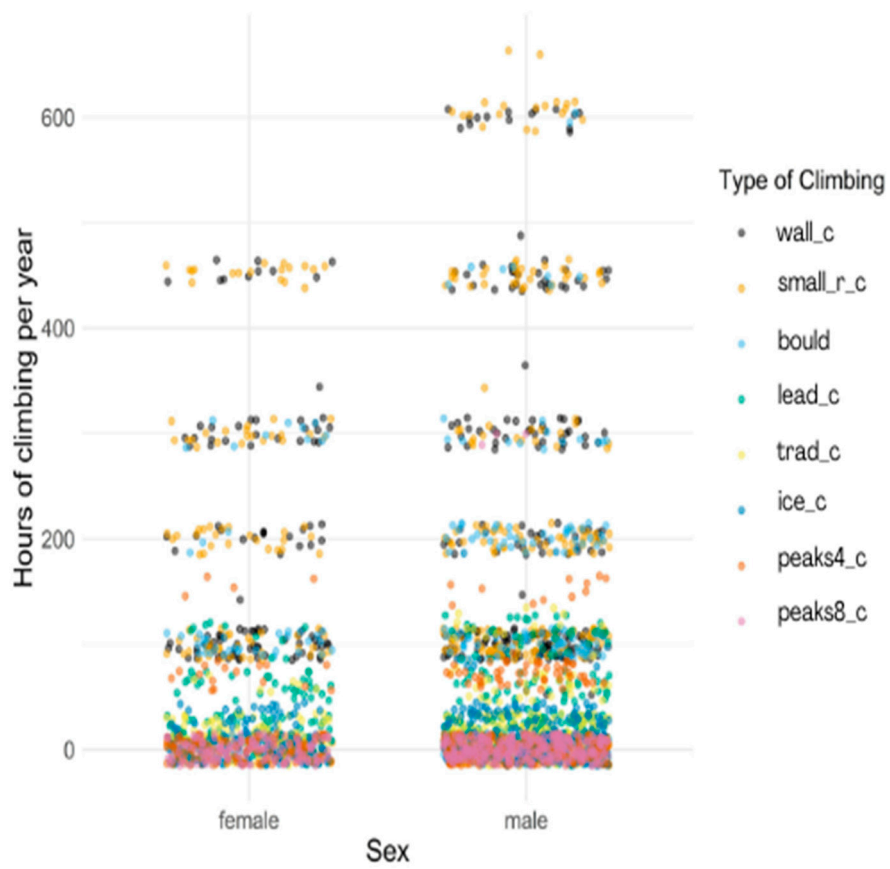

(e)

**Supplement S3:** Scatter plot of hours of climbing by: age (a), weight (b), height (c), BMI (d), sex (e) across different disciplines.
