# Supplementary material for: Analyzing Injury Patterns in Climbing: A Comprehensive Study of Risk Factors
Source: MDPI journal article supplement (doi:10.3390/sports12020061), 2024-02-19
Supplement: s1 [file s1]

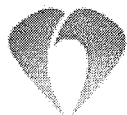

FAKULTNÍ NEMOCNICE  
OLMOUC

Etická komise Fakultní nemocnice Olomouc a Lékařské fakulty UP v Olomouci

Zdravotníků 248/7, 779 00 Olomouc

předseda: MUDr. Jindřiška Burešová, tel: 588 443420, e-mail: jindriska.buresova@fnol.cz

tajemnice tel., fax 588442477, e-mail: iveta.sudolska@fnol.cz

## STANOVISKO ETICKÉ KOMISE

*Opinion of the Ethics Committee*

Číslo jednací/Reference number: 173/23

Název výzkumného projektu: Analyzing Injury Patterns in Climbing: A Comprehensive study of risk factors

Žadatel/Applicant: Mgr. Markéta Kovářová, Ústav normální anatomie, UP Olomouc

Datum doručení žádosti/Date of submission of the Application Form: 11.12.2023

Datum jednání EK /Date of Ethics Committee's session: 11.12.2023

Vyjádření EK/ Ethics Committee's opinion:

☒ EK vydala souhlasné stanovisko / EC issued favourable opinion

☒ EK vzala na vědomí / Taken into account

Seznam míst hodnocení s označením míst, ke kterým se EK vyjádřila jako místní EK a kde vykonává dohled/List of clinical trial sites in the Czech Republic where EC has given its opinion and will perform supervision:

| Místo hodnocení/ Jméno zkoušejícího<br>Trial Site / Name of Investigator                  | Místní EK<br>Local EC               | Adresa místní EK<br>Address |
|-------------------------------------------------------------------------------------------|-------------------------------------|-----------------------------|
| Mgr. Markéta Kovářová, Ústav normální anatomie, UP Olomouc, Hněvotínská 3, 775 15 Olomouc | <input checked="" type="checkbox"/> | EK FNOL                     |

Seznam hodnocených dokumentů/List of all submitted documents:

| Název dokumentu, verze, datum<br>Document title, version, date | Schváleno<br>/Approved              |                          | Vzato na vědomí / Taken into account |                          |
|----------------------------------------------------------------|-------------------------------------|--------------------------|--------------------------------------|--------------------------|
|                                                                | ANO<br>Yes                          | NE<br>No                 | ANO<br>Yes                           | NE<br>No                 |
| Žádost o projednání výzkumného projektu                        | <input type="checkbox"/>            | <input type="checkbox"/> | <input checked="" type="checkbox"/>  | <input type="checkbox"/> |
| Sylabus projektu                                               | <input checked="" type="checkbox"/> | <input type="checkbox"/> | <input type="checkbox"/>             | <input type="checkbox"/> |
| Informovaný souhlas vč. Informace pro pacienta                 | <input checked="" type="checkbox"/> | <input type="checkbox"/> | <input type="checkbox"/>             | <input type="checkbox"/> |
| Strukturovaný životopis hlavního řešitele                      | <input type="checkbox"/>            | <input type="checkbox"/> | <input checked="" type="checkbox"/>  | <input type="checkbox"/> |

Etická komise prohlašuje, že byla ustavena a pracuje podle jednacího řádu v souladu se správnou klinickou praxí (GCP) a platnými právními předpisy/The Ethics Committee hereby declares that it was established and operates in accordance with its Rules of Procedure in compliance with Good Clinical Practice and valid legal regulations:

☒ Ano/Yes ☐ Ne/No

Datum/Date: 11.12.2023

Rozdělovník/Distribution list:

-Zadavatel

-EK

-Řešitel

1/1

MUDr. Jindřiška Burešová  
předsedkyně EK FNOL a LF UP  
Chairman of the EC FNOL and LF UP

*J. B.*

ETHICS COMMITTEE  
the University Hospital  
and the Faculty Medicine  
Palacky University In  
OLOMOUC
