# Supplementary material for: Analyzing Injury Patterns in Climbing: A Comprehensive Study of Risk Factors
Source: Sports (Basel). 2024 Feb 19;12(2):61. doi: 10.3390/sports12020061 (PMC10892067; doi:10.3390/sports12020061)
Supplement: Supplementary file 1 [file sports-12-00061-s001.zip]

Archive with 11 entries (11 files):
- figure S3 a.png
- figure S3 b.png
- figure S3 c.png
- figure S3 d.png
- figure S3 e.png
- S1 a (first part).png
- S1 b (second part).png
- S2 supplementary analysis - data.xlsx
- S3 supplenetary figures - age, weight, height, sex, BMI.pdf
- S4 ethic committee.pdf
- S5 Dataset.xlsx
