# Supplementary material for: Analyzing Injury Patterns in Climbing: A Comprehensive Study of Risk Factors
Source: Sports (Basel). 2024 Feb 19;12(2):61. doi: 10.3390/sports12020061 (PMC10892067; doi:10.3390/sports12020061)
Supplement: Supplementary file 1 [file sports-12-00061-s001.zip › S1 b (second part).png]

## Sheet: Dataset
id	wall_h	small.rocks_h	boulder_h	sport_h	traditional_h	ice_h	peaks4_h	peaks8_h	wall_r	small.rocks_r	boulder_r	sport_r	traditional_r	ice_r	peaks4_r	peaks8_r	climbing.sum_h	inj	midser.inj	severity.inj	gender	age	nationality	weight	height	BMI	boulder_inj	sport_inj	wall_inj	small.rocks_inj	others_inj	phase	treatment	consequences	mistake.cause	A	B	C	D	E	F	G	H	K	N	P	Q	R	S
ID001	100	450	0	20	20	30	0	0	0.16129	0.725806	0	0.0322581	0.0322581	0.0483871	0	0	620	1	1	3	female	34	Czech	58	1.62	22.1003	0	1	0	0	0	B_Climbing	C_hosp.short	C_longlast	others	1	0	0	0	0	0	0	0	0	0	0	0	0	0
ID002	200	0	100	0	20	0	0	0	0.625	0	0.3125	0	0.0625	0	0	0	320	0	0	1	female	40	Czech	61	1.58	24.4352	0	0	0	0	0	NA	NA	NA	NA	0	0	0	0	0	0	0	0	0	0	0	0	0	0
ID003	100	200	100	20	20	0	0	0	0.227273	0.454545	0.227273	0.0454545	0.0454545	0	0	0	440	1	1	2	male	35	Czech	70	1.76	22.5981	0	1	0	1	0	A_Approach	B_ambulance	B_almost.without	others	0	0	0	0	0	1	0	0	0	0	0	1	0	0
ID004	56	0	0	0	0	0	0	0	1	0	0	0	0	0	0	0	56	0	0	1	male	22	Czech	72	1.7	24.9135	0	0	0	0	0	NA	NA	NA	NA	0	0	0	0	0	0	0	0	0	0	0	0	0	0
ID005	450	0	0	0	0	0	0	0	1	0	0	0	0	0	0	0	450	1	0	1	female	18	Czech	56	1.72	18.9292	0	0	1	0	0	B_Climbing	A_selfhelp	A_without	others	0	0	0	0	0	0	1	0	0	0	0	0	0	0
ID006	0	200	0	20	20	30	70	0	0	0.588235	0	0.0588235	0.0588235	0.0882353	0.205882	0	340	1	1	2	male	54	Czech	92	1.72	31.0979	0	0	0	0	1	B_Climbing	B_ambulance	A_without	others	0	0	0	1	0	0	0	0	0	0	1	0	0	0
ID007	450	450	200	60	20	0	70	0	0.36	0.36	0.16	0.048	0.016	0	0.056	0	1250	0	0	1	male	50	Czech	77	1.83	22.9926	0	0	0	0	0	NA	NA	NA	NA	0	0	0	0	0	0	0	0	0	0	0	0	0	0
ID008	100	450	0	60	60	30	70	0	0.12987	0.584416	0	0.0779221	0.0779221	0.038961	0.0909091	0	770	1	1	2	male	35	Czech	73	1.8	22.5309	0	0	0	0	1	A_Approach	B_ambulance	A_without	climber	0	0	0	0	0	0	0	0	0	0	0	0	0	0
ID009	100	100	0	20	20	0	0	0	0.416667	0.416667	0	0.0833333	0.0833333	0	0	0	240	1	1	2	male	48	Czech	97	1.82	29.2839	1	0	0	0	0	B_Climbing	B_ambulance	B_almost.without	others	1	0	0	0	1	0	0	0	0	0	0	0	0	0
ID010	0	0	0	100	90	0	0	0	0	0	0	0.526316	0.473684	0	0	0	190	1	0	1	male	28	Czech	75	1.78	23.6713	0	1	0	1	0	B_Climbing	A_selfhelp	A_without	climber	0	0	0	0	0	0	0	0	0	0	0	1	0	0
ID011	100	0	100	0	0	0	0	0	0.5	0	0.5	0	0	0	0	0	200	0	0	1	male	18	Czech	70	1.85	20.4529	0	0	0	0	0	NA	NA	NA	NA	0	0	0	0	0	0	0	0	0	0	0	0	0	0
ID012	100	200	0	20	20	30	150	0	0.192308	0.384615	0	0.0384615	0.0384615	0.0576923	0.288462	0	520	0	0	1	female	30	Czech	65	1.64	24.1672	0	0	0	0	0	NA	NA	NA	NA	0	0	0	0	0	0	0	0	0	0	0	0	0	0
ID013	0	0	0	20	20	0	0	0	0	0	0	0.5	0.5	0	0	0	40	0	0	1	male	41	Czech	90	1.83	26.8745	0	0	0	0	0	NA	NA	NA	NA	0	0	0	0	0	0	0	0	0	0	0	0	0	0
ID014	100	100	0	0	0	0	0	0	0.5	0.5	0	0	0	0	0	0	200	1	0	1	male	44	Czech	76	1.8	23.4568	0	1	0	1	0	B_Climbing	A_selfhelp	B_almost.without	others	0	0	0	0	0	0	0	0	0	0	0	1	0	0
ID015	100	100	0	60	0	0	150	0	0.243902	0.243902	0	0.146341	0	0	0.365854	0	410	1	1	2	male	28	Czech	83	1.78	26.1962	0	1	0	1	0	C_Descent	B_ambulance	A_without	climber	0	0	0	0	0	0	0	0	1	0	0	0	0	0
ID016	100	0	300	0	0	0	80	0	0.208333	0	0.625	0	0	0	0.166667	0	480	0	0	1	male	23	Czech	70	1.8	21.6049	0	0	0	0	0	NA	NA	NA	NA	0	0	0	0	0	0	0	0	0	0	0	0	0	0
ID017	100	200	0	20	0	0	0	0	0.3125	0.625	0	0.0625	0	0	0	0	320	0	0	1	male	31	Slovak	80	1.83	23.8884	0	0	0	0	0	NA	NA	NA	NA	0	0	0	0	0	0	0	0	0	0	0	0	0	0
ID018	100	0	300	0	0	0	0	0	0.25	0	0.75	0	0	0	0	0	400	0	0	1	male	27	Czech	70	1.74	23.1206	0	0	0	0	0	NA	NA	NA	NA	0	0	0	0	0	0	0	0	0	0	0	0	0	0
ID019	100	200	200	20	20	30	0	0	0.175439	0.350877	0.350877	0.0350877	0.0350877	0.0526316	0	0	570	3	0	1	male	25	Czech	83	1.9	22.9917	0	0	0	0	1	C_Descent	A_selfhelp	A_without	climber	0	0	0	0	0	0	0	0	0	0	1	0	0	0
ID020	300	450	100	20	0	0	0	0	0.344828	0.517241	0.114943	0.0229885	0	0	0	0	870	0	0	1	male	25	Czech	83	1.86	23.9912	0	0	0	0	0	NA	NA	NA	NA	0	0	0	0	0	0	0	0	0	0	0	0	0	0
ID021	600	0	100	0	0	0	0	0	0.857143	0	0.142857	0	0	0	0	0	700	0	0	1	male	21	Czech	80	1.73	26.7299	0	0	0	0	0	NA	NA	NA	NA	0	0	0	0	0	0	0	0	0	0	0	0	0	0
ID022	200	200	100	20	20	30	0	0	0.350877	0.350877	0.175439	0.0350877	0.0350877	0.0526316	0	0	570	0	0	1	male	37	Czech	110	1.97	28.3439	0	0	0	0	0	NA	NA	NA	NA	0	0	0	0	0	0	0	0	0	0	0	0	0	0
ID023	100	600	200	20	0	30	0	0	0.105263	0.631579	0.210526	0.0210526	0	0.0315789	0	0	950	3	2	2	male	22	Czech	62	1.83	18.5135	0	1	0	1	0	B_Climbing	A_selfhelp	A_without	others	0	0	0	0	0	0	0	0	0	0	1	0	0	0
ID024	100	100	0	0	20	30	0	0	0.4	0.4	0	0	0.08	0.12	0	0	250	1	0	1	male	33	Czech	72	1.72	24.3375	0	0	1	0	0	C_Descent	A_selfhelp	A_without	belaying	0	0	0	1	0	0	0	0	0	0	0	0	0	0
ID025	100	100	0	0	0	30	150	0	0.263158	0.263158	0	0	0	0.0789474	0.394737	0	380	0	0	1	male	44	Czech	125	2.03	30.3332	0	0	0	0	0	NA	NA	A_without	NA	0	0	0	0	0	0	0	0	0	0	0	0	0	0
ID026	100	100	0	20	20	30	0	0	0.37037	0.37037	0	0.0740741	0.0740741	0.111111	0	0	270	1	0	1	male	30	Czech	90	1.89	25.1953	0	1	0	1	0	B_Climbing	A_selfhelp	A_without	climber	0	0	0	0	0	0	0	0	1	0	0	0	0	0
ID027	100	100	600	20	0	0	80	0	0.111111	0.111111	0.666667	0.0222222	0	0	0.0888889	0	900	1	1	2	male	19	Czech	70	1.79	21.847	1	0	0	0	0	C_Descent	B_ambulance	B_almost.without	climber	1	0	0	0	0	0	0	0	0	0	0	0	0	0
ID028	100	0	100	0	0	0	0	0	0.5	0	0.5	0	0	0	0	0	200	1	1	2	female	37	Czech	65	1.76	20.984	1	0	0	0	0	C_Descent	B_ambulance	B_almost.without	climber	0	0	0	0	0	0	0	0	0	1	0	0	0	0
ID029	100	100	0	0	0	0	0	0	0.5	0.5	0	0	0	0	0	0	200	1	0	1	female	37	Czech	68	1.68	24.093	0	0	1	0	0	B_Climbing	B_ambulance	B_almost.without	climber	0	0	0	0	1	0	0	0	0	0	0	0	0	0
ID030	600	0	100	20	20	0	0	0	0.810811	0	0.135135	0.027027	0.027027	0	0	0	740	3	1	1.5	male	23	Czech	68	1.75	22.2041	1	0	0	0	0	B_Climbing	B_ambulance	A_without	climber	1	0	0	0	0	0	0	0	0	0	0	0	0	0
ID031	0	0	0	20	20	0	70	0	0	0	0	0.181818	0.181818	0	0.636364	0	110	0	0	1	male	44	Czech	90	1.87	25.7371	0	0	0	0	0	NA	NA	NA	NA	0	0	0	0	0	0	0	0	0	0	0	0	0	0
ID032	200	100	0	100	60	0	0	0	0.434783	0.217391	0	0.217391	0.130435	0	0	0	460	1	0	1	male	35	Czech	65	1.84	19.199	0	0	1	0	0	B_Climbing	A_selfhelp	B_almost.without	others	0	0	0	0	0	0	0	0	0	0	1	0	0	0
ID033	100	0	0	0	0	0	0	0	1	0	0	0	0	0	0	0	100	0	0	1	female	24	Czech	43	1.77	13.7253	0	0	0	0	0	NA	NA	NA	NA	0	0	0	0	0	0	0	0	0	0	0	0	0	0
ID034	600	200	200	20	20	0	0	0	0.576923	0.192308	0.192308	0.0192308	0.0192308	0	0	0	1040	0	0	1	male	27	Czech	62	1.83	18.5135	0	0	0	0	0	NA	NA	NA	NA	0	0	0	0	0	0	0	0	0	0	0	0	0	0
ID035	100	0	0	0	0	0	0	0	1	0	0	0	0	0	0	0	100	1	0	1	female	34	Czech	62	1.68	21.9671	0	0	1	0	0	C_Descent	A_selfhelp	A_without	belaying	0	1	0	0	0	0	0	0	0	0	0	0	0	0
ID036	100	100	0	20	20	30	0	0	0.37037	0.37037	0	0.0740741	0.0740741	0.111111	0	0	270	0	0	1	male	37	Czech	86	1.78	27.143	0	0	0	0	0	NA	NA	NA	NA	0	0	0	0	0	0	0	0	0	0	0	0	0	0
ID037	300	200	0	100	20	0	0	0	0.483871	0.322581	0	0.16129	0.0322581	0	0	0	620	0	0	1	male	30	Czech	62	1.82	18.7175	0	0	0	0	0	NA	NA	NA	NA	0	0	0	0	0	0	0	0	0	0	0	0	0	0
ID038	100	100	0	0	20	0	0	0	0.454545	0.454545	0	0	0.0909091	0	0	0	220	1	0	1	male	39	Czech	NA	NA	NA	0	0	0	0	1	B_Climbing	A_selfhelp	B_almost.without	others	0	0	0	0	0	0	0	0	1	0	0	0	0	0
ID039	450	450	0	60	0	0	0	0	0.46875	0.46875	0	0.0625	0	0	0	0	960	1	0	1	male	45	Czech	71	1.67	25.4581	0	0	1	0	0	B_Climbing	A_selfhelp	A_without	others	0	0	0	0	0	0	0	0	0	0	0	1	0	0
ID040	100	100	0	0	0	0	0	0	0.5	0.5	0	0	0	0	0	0	200	1	0	1	male	28	Czech	92	1.84	27.1739	0	1	0	1	0	B_Climbing	A_selfhelp	B_almost.without	climber	0	0	0	0	0	0	0	0	0	0	0	0	0	0
ID041	100	0	0	0	0	0	0	0	1	0	0	0	0	0	0	0	100	0	0	1	female	30	Czech	63	1.7	21.7993	0	0	0	0	0	NA	NA	NA	NA	0	0	0	0	0	0	0	0	0	0	0	0	0	0
ID042	200	0	100	0	0	0	0	0	0.666667	0	0.333333	0	0	0	0	0	300	0	0	1	male	31	Czech	77	1.89	21.5559	0	0	0	0	0	NA	NA	NA	NA	0	0	0	0	0	0	0	0	0	0	0	0	0	0
ID043	200	0	0	0	20	0	70	0	0.689655	0	0	0	0.0689655	0	0.241379	0	290	0	0	1	male	23	Czech	72	1.8	22.2222	0	0	0	0	0	NA	NA	NA	NA	0	0	0	0	0	0	0	0	0	0	0	0	0	0
ID044	100	0	0	0	0	0	0	0	1	0	0	0	0	0	0	0	100	0	0	1	female	29	Czech	55	1.63	20.7008	0	0	0	0	0	NA	NA	NA	NA	0	0	0	0	0	0	0	0	0	0	0	0	0	0
ID045	0	450	0	20	20	30	0	0	0	0.865385	0	0.0384615	0.0384615	0.0576923	0	0	520	1	1	2	female	28	Czech	62	1.66	22.4996	0	1	0	1	0	B_Climbing	B_ambulance	B_almost.without	climber	0	0	1	0	0	0	0	0	0	1	1	0	0	0
ID046	300	200	200	0	0	0	0	0	0.428571	0.285714	0.285714	0	0	0	0	0	700	1	1	2	male	22	Czech	72	1.78	22.7244	0	0	1	0	0	B_Climbing	B_ambulance	A_without	belaying	1	0	0	0	0	0	0	0	0	0	0	0	0	0
ID047	100	0	100	20	20	0	0	0	0.416667	0	0.416667	0.0833333	0.0833333	0	0	0	240	1	1	2	female	18	Czech	80	1.8	24.6914	0	0	1	0	0	B_Climbing	B_ambulance	B_almost.without	climber	0	0	0	0	0	0	0	0	0	0	0	0	0	0
ID048	100	100	0	0	20	30	70	0	0.3125	0.3125	0	0	0.0625	0.09375	0.21875	0	320	3	2	1.66667	male	41	Czech	74	1.82	22.3403	0	0	0	0	1	B_Climbing	B_ambulance	B_almost.without	climber	1	0	0	0	0	0	0	0	0	0	0	0	0	0
ID049	100	100	100	50	0	0	0	0	0.285714	0.285714	0.285714	0.142857	0	0	0	0	350	1	1	2	male	29	Czech	68	1.76	21.9525	0	1	0	1	0	B_Climbing	B_ambulance	A_without	climber	1	0	0	0	0	0	0	0	0	0	0	0	0	0
ID050	0	100	100	20	0	0	0	0	0	0.454545	0.454545	0.0909091	0	0	0	0	220	2	1	2	male	35	Czech	80	1.85	23.3747	0	1	0	1	0	B_Climbing	C_hosp.short	A_without	climber	0	0	0	0	0	0	0	0	0	0	0	1	0	0
ID051	100	100	0	20	0	0	0	0	0.454545	0.454545	0	0.0909091	0	0	0	0	220	1	0	1	male	29	Czech	130	1.96	33.8401	0	1	0	1	0	B_Climbing	A_selfhelp	B_almost.without	climber	0	0	0	0	0	0	0	0	1	0	0	0	0	0
ID052	145	0	0	20	0	0	0	0	0.878788	0	0	0.121212	0	0	0	0	165	0	0	1	female	33	Czech	64	1.73	21.3839	0	0	0	0	0	NA	NA	NA	NA	0	0	0	0	0	0	0	0	0	0	0	0	0	0
ID053	0	100	100	0	0	0	0	0	0	0.5	0.5	0	0	0	0	0	200	1	1	2	male	28	Slovak	75	1.8	23.1481	0	1	0	1	0	B_Climbing	B_ambulance	A_without	others	0	0	0	1	0	0	0	0	0	0	0	0	0	0
ID054	150	650	200	20	0	0	0	0	0.147059	0.637255	0.196078	0.0196078	0	0	0	0	1020	1	1	3	male	30	Czech	83	1.86	23.9912	0	0	0	0	1	B_Climbing	D_hosp.long	C_longlast	climber	1	0	0	0	0	0	0	0	0	0	0	0	0	0
ID055	75	100	100	60	0	0	0	0	0.223881	0.298507	0.298507	0.179104	0	0	0	0	335	0	0	1	female	33	Czech	45	1.52	19.4771	0	0	0	0	0	NA	NA	NA	NA	0	0	0	0	0	0	0	0	0	0	0	0	0	0
ID056	600	100	100	20	20	0	0	0	0.714286	0.119048	0.119048	0.0238095	0.0238095	0	0	0	840	1	1	3	male	24	Czech	65	1.71	22.2291	0	1	0	1	0	NA	A_selfhelp	C_longlast	others	0	0	0	0	0	0	0	0	0	0	1	0	0	0
ID057	0	200	0	0	20	30	0	0	0	0.8	0	0	0.08	0.12	0	0	250	5	3	1.6	male	69	Czech	80	1.8	24.6914	0	1	0	1	0	B_Climbing	B_ambulance	C_longlast	climber	0	0	0	0	0	0	0	0	0	0	0	0	0	1
ID058	350	0	0	20	20	0	0	0	0.897436	0	0	0.0512821	0.0512821	0	0	0	390	0	0	1	male	18	Czech	74	1.77	23.6203	0	0	0	0	0	NA	NA	NA	NA	0	0	0	0	0	0	0	0	0	0	0	0	0	0
ID059	100	100	0	120	20	30	0	0	0.27027	0.27027	0	0.324324	0.0540541	0.0810811	0	0	370	1	1	2	female	36	Czech	65	1.8	20.0617	0	1	0	1	0	A_Approach	B_ambulance	B_almost.without	others	1	0	0	0	0	0	0	0	0	0	0	0	0	0
ID060	350	100	100	120	0	0	0	0	0.522388	0.149254	0.149254	0.179104	0	0	0	0	670	3	2	1.66667	female	19	Czech	60	1.7	20.7612	1	0	0	0	0	B_Climbing	B_ambulance	A_without	others	0	0	0	0	0	0	0	0	0	0	1	0	0	0
ID061	200	600	0	60	20	0	0	0	0.227273	0.681818	0	0.0681818	0.0227273	0	0	0	880	3	3	3	male	64	Czech	69	1.74	22.7903	0	0	1	0	0	C_Descent	D_hosp.long	D_longlast.serious	belaying	1	0	0	0	0	0	0	0	0	0	0	0	0	0
ID062	100	100	0	10	20	0	70	0	0.333333	0.333333	0	0.0333333	0.0666667	0	0.233333	0	300	0	0	1	female	48	Czech	50	1.6	19.53	0	0	0	0	0	NA	NA	NA	NA	0	0	0	0	0	0	0	0	0	0	0	0	0	0
ID063	300	350	200	20	120	90	70	0	0.26087	0.304348	0.173913	0.0173913	0.104348	0.0782609	0.0608696	0	1150	1	1	2	male	21	Czech	95	1.9	26.3158	0	0	0	0	1	B_Climbing	B_ambulance	A_without	others	0	0	0	0	0	0	0	0	0	0	0	0	0	1
ID064	200	200	100	20	20	0	70	0	0.327869	0.327869	0.163934	0.0327869	0.0327869	0	0.114754	0	610	1	1	2	female	28	Czech	57	1.6	22.2656	1	0	0	0	0	B_Climbing	B_ambulance	B_almost.without	climber	1	0	0	0	0	0	0	0	0	0	0	0	0	0
ID065	100	0	0	0	0	0	0	0	1	0	0	0	0	0	0	0	100	0	0	1	male	30	Slovak	85	1.96	22.1262	0	0	0	0	0	NA	NA	NA	NA	0	0	0	0	0	0	0	0	0	0	0	0	0	0
ID066	200	200	200	60	60	30	0	0	0.266667	0.266667	0.266667	0.08	0.08	0.04	0	0	750	2	2	3	male	29	Slovak	75	1.83	22.3954	0	1	0	1	0	B_Climbing	D_hosp.long	B_almost.without	others	0	0	0	0	0	0	0	0	1	0	0	0	0	0
ID067	0	0	0	0	20	30	150	0	0	0	0	0	0.1	0.15	0.75	0	200	0	0	1	male	35	Slovak	80	1.88	22.6347	0	0	0	0	0	NA	NA	NA	NA	0	0	0	0	0	0	0	0	0	0	0	0	0	0
ID068	200	100	100	60	60	0	70	0	0.338983	0.169492	0.169492	0.101695	0.101695	0	0.118644	0	590	1	0	1	male	31	Slovak	82	1.82	24.7555	0	1	0	1	0	B_Climbing	A_selfhelp	A_without	climber	0	0	0	0	0	1	0	0	0	0	0	0	0	0
ID069	100	200	100	20	20	30	0	0	0.212766	0.425532	0.212766	0.0425532	0.0425532	0.0638298	0	0	470	0	0	1	male	25	Slovak	60	1.61	23.1473	0	0	0	0	0	NA	NA	NA	NA	0	0	0	0	0	0	0	0	0	0	0	0	0	0
ID070	300	200	0	0	20	0	0	0	0.576923	0.384615	0	0	0.0384615	0	0	0	520	0	0	1	male	29	Czech	73	1.83	21.7982	0	0	0	0	0	NA	NA	NA	NA	0	0	0	0	0	0	0	0	0	0	0	0	0	0
ID071	100	200	100	120	120	0	70	0	0.140845	0.28169	0.140845	0.169014	0.169014	0	0.0985915	0	710	1	1	2	male	32	Slovak	75	1.74	24.7721	0	0	0	0	1	B_Climbing	C_hosp.short	B_almost.without	others	0	0	0	0	0	0	0	0	1	0	0	0	0	0
ID072	200	450	100	120	120	200	70	0	0.15873	0.357143	0.0793651	0.0952381	0.0952381	0.15873	0.0555556	0	1260	1	0	1	male	55	Slovak	75	1.75	24.4898	0	0	0	0	1	B_Climbing	A_selfhelp	B_almost.without	climber	0	0	1	0	0	0	0	1	0	0	0	0	0	0
ID073	0	0	0	20	20	0	70	0	0	0	0	0.181818	0.181818	0	0.636364	0	110	1	0	1	male	36	Czech	90	1.78	28.4055	0	0	0	0	1	A_Approach	A_selfhelp	A_without	others	1	0	0	0	0	0	0	0	0	0	0	0	0	0
ID074	100	100	0	0	20	30	0	0	0.4	0.4	0	0	0.08	0.12	0	0	250	1	1	2	female	30	Slovak	55	1.65	20.202	0	1	0	1	0	B_Climbing	A_selfhelp	C_longlast	others	0	0	0	0	0	1	0	0	0	0	0	0	0	0
ID075	600	600	0	20	20	0	0	0	0.483871	0.483871	0	0.016129	0.016129	0	0	0	1240	1	0	1	male	35	Slovak	70	1.74	23.1206	0	0	1	0	0	B_Climbing	A_selfhelp	A_without	climber	0	0	0	0	1	0	0	0	0	0	0	0	0	0
ID076	100	100	100	20	20	30	0	0	0.27027	0.27027	0.27027	0.0540541	0.0540541	0.0810811	0	0	370	1	0	1	male	32	Slovak	75	1.72	25.3515	0	0	0	0	1	B_Climbing	A_selfhelp	A_without	climber	0	0	0	0	0	1	0	0	0	0	0	0	0	0
ID077	100	100	100	0	0	0	0	0	0.333333	0.333333	0.333333	0	0	0	0	0	300	1	1	2	male	35	Slovak	76	1.73	25.3934	0	0	1	0	0	B_Climbing	B_ambulance	A_without	belaying	1	0	0	0	0	0	0	0	0	0	0	0	0	0
ID078	300	100	0	20	20	0	0	0	0.681818	0.227273	0	0.0454545	0.0454545	0	0	0	440	1	0	1	male	23	Slovak	87	1.78	27.4587	0	1	0	1	0	B_Climbing	A_selfhelp	A_without	climber	0	0	0	0	0	0	0	0	0	0	1	0	0	0
ID079	200	200	0	20	20	0	0	0	0.454545	0.454545	0	0.0454545	0.0454545	0	0	0	440	0	0	1	female	22	Slovak	61	1.7	21.1073	0	0	0	0	0	NA	NA	NA	NA	0	0	0	0	0	0	0	0	0	0	0	0	0	0
ID080	0	100	0	0	20	30	0	0	0	0.666667	0	0	0.133333	0.2	0	0	150	0	0	1	male	21	Slovak	73	1.83	21.7982	0	0	0	0	0	NA	NA	NA	NA	0	0	0	0	0	0	0	0	0	0	0	0	0	0
ID081	100	100	0	0	0	0	150	0	0.285714	0.285714	0	0	0	0	0.428571	0	350	0	0	1	female	24	Slovak	67	1.7	23.1834	0	0	0	0	0	NA	NA	NA	NA	0	0	0	0	0	0	0	0	0	0	0	0	0	0
ID082	100	100	0	20	20	30	0	0	0.37037	0.37037	0	0.0740741	0.0740741	0.111111	0	0	270	2	2	2	male	21	Slovak	74	1.84	21.8573	0	0	0	0	1	C_Descent	B_ambulance	A_without	others	1	0	0	0	0	0	0	0	0	0	0	0	0	0
ID083	200	200	200	20	0	30	150	0	0.25	0.25	0.25	0.025	0	0.0375	0.1875	0	800	1	0	1	male	23	Slovak	70	1.75	22.8571	1	0	0	0	0	B_Climbing	A_selfhelp	A_without	climber	0	0	0	0	0	0	0	0	0	0	1	0	0	0
ID084	100	200	0	20	20	30	0	0	0.27027	0.540541	0	0.0540541	0.0540541	0.0810811	0	0	370	0	0	1	female	34	Slovak	50	1.67	17.9282	0	0	0	0	0	NA	NA	NA	NA	0	0	0	0	0	0	0	0	0	0	0	0	0	0
ID085	0	100	0	20	20	30	70	0	0	0.416667	0	0.0833333	0.0833333	0.125	0.291667	0	240	2	2	2.5	male	38	Czech	82	1.8	25.3086	0	0	0	0	1	C_Descent	B_ambulance	A_without	climber	0	0	0	0	0	0	0	0	0	0	0	0	1	0
ID086	300	600	0	60	60	30	0	0	0.285714	0.571429	0	0.0571429	0.0571429	0.0285714	0	0	1050	2	1	2	male	34	Slovak	102	1.88	28.8592	0	1	0	1	0	B_Climbing	A_selfhelp	B_almost.without	climber	1	0	0	0	0	0	0	0	0	0	0	0	0	0
ID087	200	300	0	20	60	30	70	0	0.294118	0.441176	0	0.0294118	0.0882353	0.0441176	0.102941	0	680	2	1	2	male	25	Czech	85	1.82	25.6612	0	0	0	0	1	C_Descent	A_selfhelp	C_longlast	others	1	0	0	0	0	0	0	1	0	0	0	0	0	0
ID088	100	100	200	100	20	0	0	0	0.192308	0.192308	0.384615	0.192308	0.0384615	0	0	0	520	1	1	2	male	45	Czech	90	1.93	24.1617	0	1	0	1	0	C_Descent	B_ambulance	A_without	others	1	0	0	0	0	0	0	0	0	0	0	0	0	0
ID089	0	200	0	20	20	30	0	0	0	0.740741	0	0.0740741	0.0740741	0.111111	0	0	270	0	0	1	male	29	Slovak	80	1.81	24.4193	0	0	0	0	0	NA	NA	NA	NA	0	0	0	0	0	0	0	0	0	0	0	0	0	0
ID090	100	600	0	60	20	30	0	0	0.123457	0.740741	0	0.0740741	0.0246914	0.037037	0	0	810	3	2	1.66667	male	35	Slovak	76	1.74	25.1024	0	1	0	1	0	B_Climbing	A_selfhelp	B_almost.without	others	1	0	0	0	0	0	0	0	0	0	0	0	0	0
ID091	0	0	0	20	20	0	0	0	0	0	0	0.5	0.5	0	0	0	40	1	1	2	male	43	Slovak	78	1.81	23.8088	0	1	0	1	0	B_Climbing	B_ambulance	A_without	climber	0	0	0	0	0	0	0	1	0	0	0	0	0	0
ID092	450	100	100	100	20	0	0	0	0.584416	0.12987	0.12987	0.12987	0.025974	0	0	0	770	2	2	2	male	34	Slovak	84	1.85	24.5435	0	1	0	1	0	A_Approach	B_ambulance	A_without	belaying	0	0	0	0	0	0	0	0	0	0	1	0	0	0
ID093	0	200	100	20	60	30	0	0	0	0.487805	0.243902	0.0487805	0.146341	0.0731707	0	0	410	1	1	2	male	29	Slovak	73	1.79	22.7833	0	1	0	1	0	B_Climbing	B_ambulance	B_almost.without	climber	0	0	0	0	0	0	0	0	0	0	0	0	0	0
ID094	200	650	0	0	60	30	0	0	0.212766	0.691489	0	0	0.0638298	0.0319149	0	0	940	1	0	1	male	23	Slovak	73	1.75	23.8367	0	0	0	0	1	B_Climbing	A_selfhelp	A_without	climber	0	0	0	0	0	0	0	0	0	0	0	0	1	0
ID095	300	300	0	60	20	30	0	0	0.422535	0.422535	0	0.084507	0.028169	0.0422535	0	0	710	1	0	1	male	40	Slovak	72	1.7	24.9135	0	1	0	1	0	B_Climbing	A_selfhelp	A_without	climber	0	0	0	0	0	0	0	0	0	0	1	0	0	0
ID096	100	200	0	60	20	30	0	0	0.243902	0.487805	0	0.146341	0.0487805	0.0731707	0	0	410	1	1	2	female	30	Slovak	NA	NA	NA	0	1	0	1	0	B_Climbing	B_ambulance	B_almost.without	climber	1	0	0	0	0	0	0	0	0	0	0	0	0	0
ID097	200	200	200	120	20	30	0	0	0.25974	0.25974	0.25974	0.155844	0.025974	0.038961	0	0	770	1	0	1	female	29	Czech	67	1.72	22.6474	0	1	0	1	0	C_Descent	A_selfhelp	A_without	climber	1	0	0	0	0	0	0	0	0	0	0	0	0	0
ID098	300	450	0	60	20	0	0	0	0.361446	0.542169	0	0.0722892	0.0240964	0	0	0	830	0	0	1	female	23	Czech	63	1.84	18.6082	0	0	0	0	0	NA	NA	NA	NA	0	0	0	0	0	0	0	0	0	0	0	0	0	0
ID099	100	100	0	20	0	0	0	0	0.454545	0.454545	0	0.0909091	0	0	0	0	220	1	0	1	male	39	Czech	80	1.64	29.7442	0	0	1	0	0	B_Climbing	A_selfhelp	A_without	others	0	0	0	0	0	0	0	0	0	0	1	0	0	0
ID100	600	600	300	20	20	30	0	0	0.382166	0.382166	0.191083	0.0127389	0.0127389	0.0191083	0	0	1570	2	2	2.5	male	55	Czech	72	1.75	23.5102	0	0	0	0	1	B_Climbing	C_hosp.short	A_without	climber	0	0	1	0	0	0	0	1	0	0	0	0	0	0
ID101	0	100	0	20	0	30	0	0	0	0.666667	0	0.133333	0	0.2	0	0	150	3	3	3	male	51	Czech	114	1.85	33.309	0	1	0	1	0	C_Descent	D_hosp.long	A_without	climber	0	1	0	0	0	0	0	0	0	0	0	0	0	0
ID102	100	300	0	60	0	0	0	0	0.217391	0.652174	0	0.130435	0	0	0	0	460	1	0	1	male	45	Czech	80	1.74	26.4236	0	1	0	1	0	B_Climbing	A_selfhelp	A_without	climber	0	0	0	0	0	0	0	0	0	0	0	0	0	0
ID103	100	450	0	20	0	0	0	0	0.175439	0.789474	0	0.0350877	0	0	0	0	570	1	1	2	female	20	Slovak	50	1.7	17.301	0	0	0	0	1	B_Climbing	B_ambulance	B_almost.without	others	0	0	0	0	0	0	0	0	0	0	1	0	0	0
ID104	100	300	0	60	20	30	70	0	0.172414	0.517241	0	0.103448	0.0344828	0.0517241	0.12069	0	580	0	0	1	female	29	Czech	50	1.65	18.3655	0	0	0	0	0	NA	NA	NA	NA	0	0	0	0	0	0	0	0	0	0	0	0	0	0
ID105	300	450	100	20	20	30	70	0	0.30303	0.454545	0.10101	0.020202	0.020202	0.030303	0.0707071	0	990	2	2	2	female	38	Czech	76	1.73	25.3934	1	0	0	0	0	C_Descent	B_ambulance	A_without	climber	1	0	0	0	0	0	0	0	0	0	0	0	0	0
ID106	600	450	100	20	20	0	0	0	0.504202	0.378151	0.0840336	0.0168067	0.0168067	0	0	0	1190	4	1	1.25	male	27	Czech	83	1.77	26.493	0	1	0	1	0	A_Approach	B_ambulance	A_without	others	0	0	0	0	0	0	0	0	0	0	1	0	0	0
ID107	450	0	100	0	0	0	0	0	0.818182	0	0.181818	0	0	0	0	0	550	1	1	2	male	29	Czech	78	1.98	19.8959	1	0	0	0	0	B_Climbing	B_ambulance	B_almost.without	climber	0	0	0	0	0	0	0	0	0	0	1	0	0	0
ID108	100	100	100	120	20	0	0	0	0.227273	0.227273	0.227273	0.272727	0.0454545	0	0	0	440	1	0	1	male	27	Czech	100	1.83	29.8606	0	0	1	0	0	B_Climbing	A_selfhelp	B_almost.without	others	0	0	0	0	0	0	0	0	0	0	1	0	0	0
ID109	450	200	450	20	20	0	70	0	0.371901	0.165289	0.371901	0.0165289	0.0165289	0	0.0578512	0	1210	3	3	2.33333	male	24	Czech	68	1.78	21.4619	0	1	0	1	0	C_Descent	C_hosp.short	A_without	others	0	1	0	0	0	0	0	0	0	0	0	0	0	0
ID110	300	300	300	20	20	0	0	0	0.319149	0.319149	0.319149	0.0212766	0.0212766	0	0	0	940	4	4	2.25	female	31	Czech	47	1.53	20.0777	0	0	1	0	0	B_Climbing	B_ambulance	C_longlast	others	0	0	0	0	0	0	0	0	0	0	0	0	0	0
ID111	300	200	300	60	60	0	0	0	0.326087	0.217391	0.326087	0.0652174	0.0652174	0	0	0	920	2	1	1.5	male	29	Czech	90	1.81	27.4717	0	0	1	0	0	B_Climbing	A_selfhelp	A_without	others	0	0	0	0	0	0	0	0	0	0	0	0	0	1
ID112	450	200	0	20	0	0	0	0	0.671642	0.298507	0	0.0298507	0	0	0	0	670	1	0	1	female	21	Czech	55	1.62	20.9572	0	0	1	0	0	B_Climbing	A_selfhelp	B_almost.without	climber	0	0	0	0	1	0	0	0	0	0	0	0	0	0
ID113	100	100	100	0	20	0	0	0	0.3125	0.3125	0.3125	0	0.0625	0	0	0	320	2	1	2	male	53	Czech	90	1.85	26.2966	1	0	0	0	0	B_Climbing	D_hosp.long	C_longlast	climber	1	0	0	0	0	0	0	0	0	0	0	0	0	0
ID114	100	200	0	0	0	0	0	0	0.333333	0.666667	0	0	0	0	0	0	300	1	0	1	male	40	Czech	90	1.93	24.1617	0	1	0	1	0	B_Climbing	A_selfhelp	A_without	climber	0	0	0	0	0	1	0	0	0	0	0	0	0	0
ID115	300	450	0	20	60	0	0	0	0.361446	0.542169	0	0.0240964	0.0722892	0	0	0	830	1	1	2	male	34	Czech	82	1.8	25.3086	0	1	0	1	0	B_Climbing	B_ambulance	A_without	climber	0	0	0	0	0	1	0	0	0	0	0	0	0	0
ID116	100	0	0	20	20	30	0	0	0.588235	0	0	0.117647	0.117647	0.176471	0	0	170	1	1	2	male	37	Czech	70	1.73	23.3887	0	0	1	0	0	B_Climbing	B_ambulance	A_without	climber	0	0	0	0	0	0	0	0	0	0	1	0	0	0
ID117	100	450	0	60	60	30	70	0	0.12987	0.584416	0	0.0779221	0.0779221	0.038961	0.0909091	0	770	2	2	2	male	29	Czech	70	1.77	22.3435	0	0	0	0	1	B_Climbing	B_ambulance	B_almost.without	others	1	0	0	0	0	0	0	0	0	0	0	0	0	0
ID118	300	300	0	60	20	0	70	0	0.4	0.4	0	0.08	0.0266667	0	0.0933333	0	750	1	0	1	male	19	Czech	60	1.63	22.5827	0	0	0	0	1	B_Climbing	A_selfhelp	B_almost.without	climber	0	0	0	0	1	0	0	0	0	0	0	0	0	1
ID119	200	300	100	100	20	30	70	0	0.243902	0.365854	0.121951	0.121951	0.0243902	0.0365854	0.0853659	0	820	3	2	1.66667	male	32	Czech	81	1.9	22.4377	0	0	1	0	0	B_Climbing	B_ambulance	B_almost.without	climber	0	0	0	1	0	0	0	0	0	0	0	0	0	0
ID120	450	450	0	60	0	30	0	0	0.454545	0.454545	0	0.0606061	0	0.030303	0	0	990	4	4	2.25	male	39	Czech	84	1.79	26.2164	0	1	0	1	0	B_Climbing	D_hosp.long	B_almost.without	belaying	0	0	1	0	0	0	0	1	0	1	0	0	0	0
ID121	100	100	100	20	20	0	0	0	0.294118	0.294118	0.294118	0.0588235	0.0588235	0	0	0	340	1	0	1	male	42	Czech	72	1.72	24.3375	0	1	0	1	0	B_Climbing	A_selfhelp	A_without	others	0	0	0	0	0	0	0	0	0	0	1	0	0	0
ID122	100	100	200	0	0	0	0	0	0.25	0.25	0.5	0	0	0	0	0	400	1	1	2	male	26	Czech	100	1.95	26.2985	1	0	0	0	0	B_Climbing	B_ambulance	B_almost.without	others	0	0	0	0	0	0	0	0	0	0	1	0	0	0
ID123	450	0	300	0	0	0	0	0	0.6	0	0.4	0	0	0	0	0	750	1	1	2	male	36	Czech	66	1.82	19.9251	0	0	0	0	0	NA	NA	B_almost.without	others	0	0	0	0	0	0	0	0	0	0	1	0	0	0
ID124	300	300	300	20	20	0	0	0	0.319149	0.319149	0.319149	0.0212766	0.0212766	0	0	0	940	5	4	1.8	female	31	Czech	47	1.53	20.0777	0	0	1	0	0	B_Climbing	B_ambulance	C_longlast	others	0	0	0	0	0	0	0	0	0	0	0	0	0	0
ID125	0	600	200	20	20	30	0	0	0	0.689655	0.229885	0.0229885	0.0229885	0.0344828	0	0	870	1	1	3	male	22	Czech	62	1.84	18.3009	1	0	0	0	0	B_Climbing	C_hosp.short	A_without	others	0	0	0	0	0	0	0	0	0	0	0	0	0	0
ID126	0	0	0	20	20	0	0	0	0	0	0	0.5	0.5	0	0	0	40	3	1	1.33333	female	42	Czech	66	1.65	24.2424	0	0	1	0	0	B_Climbing	A_selfhelp	A_without	belaying	0	0	0	0	0	0	0	0	0	0	1	0	0	0
ID127	0	100	0	20	20	0	150	300	0	0.169492	0	0.0338983	0.0338983	0	0.254237	0.508475	590	1	1	2	male	41	Czech	85	1.85	24.8356	0	1	0	1	0	B_Climbing	B_ambulance	B_almost.without	climber	1	0	0	0	0	0	0	0	0	0	0	0	0	0
ID128	100	200	0	100	60	30	0	0	0.204082	0.408163	0	0.204082	0.122449	0.0612245	0	0	490	1	1	2	female	42	Czech	53	1.59	20.9644	0	0	1	0	0	B_Climbing	B_ambulance	A_without	climber	0	0	0	0	0	0	0	0	0	0	1	0	0	0
ID129	100	300	0	120	20	0	0	0	0.185185	0.555556	0	0.222222	0.037037	0	0	0	540	1	1	3	male	39	Czech	74	1.76	23.8895	0	0	1	0	0	B_Climbing	C_hosp.short	B_almost.without	others	0	0	0	0	0	1	0	0	0	0	0	0	0	0
ID130	200	300	0	60	0	30	0	0	0.338983	0.508475	0	0.101695	0	0.0508475	0	0	590	1	0	1	female	28	Czech	59	1.72	19.9432	1	0	0	0	0	B_Climbing	A_selfhelp	A_without	climber	0	0	0	0	0	0	0	0	0	0	1	0	0	0
ID131	200	200	200	100	60	0	70	0	0.240964	0.240964	0.240964	0.120482	0.0722892	0	0.0843373	0	830	2	0	1	male	26	Czech	85	1.85	24.8356	0	0	1	0	0	A_Approach	A_selfhelp	A_without	climber	0	0	0	0	0	0	0	0	0	0	1	0	0	0
ID132	300	100	0	20	20	0	0	0	0.681818	0.227273	0	0.0454545	0.0454545	0	0	0	440	1	1	2	female	29	Czech	56	1.61	21.6041	1	0	0	0	0	B_Climbing	B_ambulance	B_almost.without	climber	1	0	0	0	0	0	0	0	0	0	0	0	0	0
ID133	200	100	0	60	0	0	0	0	0.555556	0.277778	0	0.166667	0	0	0	0	360	0	0	1	female	23	Czech	53	1.58	21.2306	0	0	0	0	0	NA	NA	NA	NA	0	0	0	0	0	0	0	0	0	0	0	0	0	0
ID134	100	0	100	60	20	0	0	0	0.357143	0	0.357143	0.214286	0.0714286	0	0	0	280	3	2	2	female	18	Czech	80	1.8	24.6914	1	0	0	0	0	B_Climbing	B_ambulance	A_without	climber	0	0	0	0	0	0	0	0	0	0	1	0	0	0
ID135	0	300	0	20	0	0	0	0	0	0.9375	0	0.0625	0	0	0	0	320	1	1	2	female	29	Czech	50	1.63	18.8189	0	1	0	1	0	NA	NA	NA	others	0	0	0	0	0	0	0	0	0	0	0	0	0	1
ID136	100	100	100	0	0	0	0	0	0.333333	0.333333	0.333333	0	0	0	0	0	300	1	1	2	female	28	Czech	73	1.73	24.3911	1	0	0	0	0	B_Climbing	B_ambulance	A_without	others	1	0	0	0	0	0	0	0	0	0	0	0	0	0
ID137	450	450	0	120	120	90	0	0	0.365854	0.365854	0	0.097561	0.097561	0.0731707	0	0	1230	1	1	2	male	50	Czech	82	1.79	25.5922	0	1	0	1	0	B_Climbing	B_ambulance	B_almost.without	others	1	0	0	0	0	0	0	0	0	0	0	0	0	0
ID138	0	0	0	20	20	0	0	0	0	0	0	0.5	0.5	0	0	0	40	1	1	2	male	21	Slovak	70	1.8	21.6049	0	1	0	1	0	B_Climbing	B_ambulance	B_almost.without	climber	1	0	0	0	0	0	0	0	0	0	0	0	0	0
ID139	300	200	100	120	120	0	0	0	0.357143	0.238095	0.119048	0.142857	0.142857	0	0	0	840	1	1	3	male	17	Czech	62	1.72	20.9573	0	1	0	1	0	B_Climbing	A_selfhelp	C_longlast	others	0	0	0	0	0	0	0	0	0	0	0	0	1	0
ID140	100	200	0	60	0	0	0	0	0.277778	0.555556	0	0.166667	0	0	0	0	360	1	0	1	female	35	Czech	68	1.64	25.2826	0	1	0	1	0	B_Climbing	A_selfhelp	A_without	climber	0	0	0	0	0	0	0	0	0	0	1	0	0	0
ID141	100	0	200	0	0	0	0	0	0.333333	0	0.666667	0	0	0	0	0	300	1	1	3	male	30	Czech	85	1.85	24.8356	1	0	0	0	0	B_Climbing	C_hosp.short	B_almost.without	climber	0	0	0	0	1	0	0	0	0	0	0	0	0	0
ID142	450	450	450	120	12	0	0	0	0.303644	0.303644	0.303644	0.0809717	0.00809717	0	0	0	1482	3	3	2.66667	male	31	Czech	88	1.91	24.1221	1	0	0	0	0	B_Climbing	B_ambulance	B_almost.without	climber	0	0	0	0	0	0	0	0	0	0	1	0	0	0
ID143	100	300	0	20	0	0	0	0	0.238095	0.714286	0	0.047619	0	0	0	0	420	3	0	1	female	34	Czech	66	1.76	21.3068	0	1	0	1	0	A_Approach	A_selfhelp	C_longlast	belaying	1	0	0	0	0	0	0	0	0	0	0	0	0	0
ID144	0	100	300	0	0	0	0	0	0	0.25	0.75	0	0	0	0	0	400	2	0	1	female	18	Czech	52	1.68	18.424	1	0	0	0	0	B_Climbing	A_selfhelp	A_without	climber	0	0	0	0	0	0	0	0	0	0	1	0	0	0
ID145	0	100	100	0	0	0	0	0	0	0.5	0.5	0	0	0	0	0	200	1	1	3	male	32	Czech	62	1.73	20.7157	1	0	0	0	0	B_Climbing	D_hosp.long	B_almost.without	climber	1	0	0	0	0	0	0	0	0	0	0	0	0	0
ID146	300	0	200	0	0	0	0	0	0.6	0	0.4	0	0	0	0	0	500	3	1	1.33333	male	29	Czech	72	1.83	21.4996	0	1	0	1	0	C_Descent	B_ambulance	B_almost.without	climber	0	1	0	0	0	0	0	0	0	0	0	0	0	0
ID147	100	0	0	0	0	0	0	0	1	0	0	0	0	0	0	0	100	0	0	1	male	23	Czech	78	1.85	22.7904	0	0	0	0	0	NA	NA	NA	NA	0	0	0	0	0	0	0	0	0	0	0	0	0	0
ID148	450	450	100	60	60	0	0	0	0.401786	0.401786	0.0892857	0.0535714	0.0535714	0	0	0	1120	1	1	2	female	55	Czech	58	1.57	23.5304	0	0	0	0	1	C_Descent	B_ambulance	A_without	others	0	0	1	0	0	0	0	0	0	0	0	0	0	0
ID149	100	0	0	60	20	0	0	0	0.555556	0	0	0.333333	0.111111	0	0	0	180	1	0	1	male	28	Czech	70	1.76	22.5981	0	0	0	0	1	B_Climbing	A_selfhelp	A_without	climber	1	0	0	0	0	0	0	0	0	0	0	0	0	0
ID150	300	100	100	0	20	0	70	0	0.508475	0.169492	0.169492	0	0.0338983	0	0.118644	0	590	0	0	1	female	21	Slovak	65	1.7	22.4913	0	0	0	0	0	NA	NA	NA	NA	0	0	0	0	0	0	0	0	0	0	0	0	0	0
ID151	100	450	0	20	20	30	0	0	0.16129	0.725806	0	0.0322581	0.0322581	0.0483871	0	0	620	0	0	1	female	34	Czech	58	1.62	22.1003	0	0	0	0	0	NA	NA	NA	NA	0	0	0	0	0	0	0	0	0	0	0	0	0	0
ID152	200	0	100	0	20	0	0	0	0.625	0	0.3125	0	0.0625	0	0	0	320	1	1	2	female	40	Czech	61	1.58	24.4352	0	1	0	1	0	A_Approach	B_ambulance	B_almost.without	others	0	0	0	0	0	1	0	0	0	0	0	1	0	0
ID153	100	200	100	20	20	0	0	0	0.227273	0.454545	0.227273	0.0454545	0.0454545	0	0	0	440	0	0	1	male	35	Czech	70	1.76	22.5981	0	0	0	0	0	NA	NA	NA	NA	0	0	0	0	0	0	0	0	0	0	0	0	0	0
ID154	56	0	0	0	0	0	0	0	1	0	0	0	0	0	0	0	56	1	0	1	male	22	Czech	72	1.7	24.9135	0	0	1	0	0	B_Climbing	A_selfhelp	A_without	others	0	0	0	0	0	0	1	0	0	0	0	0	0	0
ID155	450	0	0	0	0	0	0	0	1	0	0	0	0	0	0	0	450	1	1	2	female	18	Czech	56	1.72	18.9292	0	0	0	0	1	B_Climbing	B_ambulance	A_without	others	1	0	1	0	0	0	0	0	0	0	1	0	0	0
ID156	0	200	0	20	20	30	70	0	0	0.588235	0	0.0588235	0.0588235	0.0882353	0.205882	0	340	0	0	1	male	54	Czech	92	1.72	31.0979	0	0	0	0	0	NA	NA	NA	NA	0	0	0	0	0	0	0	0	0	0	0	0	0	0
ID157	450	450	200	60	20	0	70	0	0.36	0.36	0.16	0.048	0.016	0	0.056	0	1250	1	1	2	male	50	Czech	77	1.83	22.9926	0	0	0	0	1	A_Approach	B_ambulance	A_without	climber	0	0	0	0	0	0	0	0	0	0	0	1	0	0
ID158	100	450	0	60	60	30	70	0	0.12987	0.584416	0	0.0779221	0.0779221	0.038961	0.0909091	0	770	1	1	2	male	35	Czech	73	1.8	22.5309	1	0	0	0	0	B_Climbing	B_ambulance	B_almost.without	others	1	0	0	0	1	0	0	0	0	0	0	0	0	0
ID159	100	100	0	20	20	0	0	0	0.416667	0.416667	0	0.0833333	0.0833333	0	0	0	240	1	1	2	male	48	Czech	97	1.82	29.2839	0	1	0	1	0	B_Climbing	B_ambulance	A_without	climber	0	0	0	0	0	0	0	0	0	0	0	1	0	0
ID160	0	0	0	100	90	0	0	0	0	0	0	0.526316	0.473684	0	0	0	190	0	0	1	male	28	Czech	75	1.78	23.6713	0	0	0	0	0	NA	NA	NA	NA	0	0	0	0	0	0	0	0	0	0	0	0	0	0
ID161	100	0	100	0	0	0	0	0	0.5	0	0.5	0	0	0	0	0	200	0	0	1	male	18	Czech	70	1.85	20.4529	0	0	0	0	0	NA	NA	NA	NA	0	0	0	0	0	0	0	0	0	0	0	0	0	0
ID162	100	200	0	20	20	30	150	0	0.192308	0.384615	0	0.0384615	0.0384615	0.0576923	0.288462	0	520	0	0	1	female	30	Czech	65	1.64	24.1672	0	0	0	0	0	NA	NA	NA	NA	0	0	0	0	0	0	0	0	0	0	0	0	0	0
ID163	0	0	0	20	20	0	0	0	0	0	0	0.5	0.5	0	0	0	40	1	0	1	male	41	Czech	90	1.83	26.8745	0	1	0	1	0	B_Climbing	A_selfhelp	B_almost.without	others	0	0	0	0	0	0	0	0	0	0	0	1	0	0
ID164	100	100	0	0	0	0	0	0	0.5	0.5	0	0	0	0	0	0	200	1	1	2	male	45	Czech	76	1.8	23.4568	0	1	0	1	0	C_Descent	B_ambulance	A_without	climber	0	0	0	0	0	0	0	0	1	0	0	0	0	0
ID165	100	100	0	60	0	0	150	0	0.243902	0.243902	0	0.146341	0	0	0.365854	0	410	0	0	1	male	28	Czech	83	1.78	26.1962	0	0	0	0	0	NA	NA	NA	NA	0	0	0	0	0	0	0	0	0	0	0	0	0	0
ID166	100	0	300	0	0	0	80	0	0.208333	0	0.625	0	0	0	0.166667	0	480	0	0	1	male	23	Czech	70	1.8	21.6049	0	0	0	0	0	NA	NA	NA	NA	0	0	0	0	0	0	0	0	0	0	0	0	0	0
ID167	100	200	0	20	0	0	0	0	0.3125	0.625	0	0.0625	0	0	0	0	320	0	0	1	male	31	Slovak	80	1.83	23.8884	0	0	0	0	0	NA	NA	NA	NA	0	0	0	0	0	0	0	0	0	0	0	0	0	0
ID168	100	0	300	0	0	0	0	0	0.25	0	0.75	0	0	0	0	0	400	3	0	1	male	27	Czech	70	1.74	23.1206	0	0	0	0	1	C_Descent	A_selfhelp	A_without	climber	0	0	0	0	0	0	0	0	0	0	1	0	0	0
ID169	100	200	200	20	20	30	0	0	0.175439	0.350877	0.350877	0.0350877	0.0350877	0.0526316	0	0	570	0	0	1	male	25	Czech	83	1.9	22.9917	0	0	0	0	0	NA	NA	NA	NA	0	0	0	0	0	0	0	0	0	0	0	0	0	0
ID170	300	450	100	20	0	0	0	0	0.344828	0.517241	0.114943	0.0229885	0	0	0	0	870	0	0	1	male	25	Czech	83	1.86	23.9912	0	0	0	0	0	NA	NA	NA	NA	0	0	0	0	0	0	0	0	0	0	0	0	0	0
ID171	600	0	100	0	0	0	0	0	0.857143	0	0.142857	0	0	0	0	0	700	0	0	1	male	21	Czech	80	1.73	26.7299	0	0	0	0	0	NA	NA	NA	NA	0	0	0	0	0	0	0	0	0	0	0	0	0	0
ID172	200	200	100	20	20	30	0	0	0.350877	0.350877	0.175439	0.0350877	0.0350877	0.0526316	0	0	570	3	2	2	male	37	Czech	110	1.97	28.3439	0	1	0	1	0	B_Climbing	A_selfhelp	A_without	others	0	0	0	0	0	0	0	0	0	0	1	0	0	0
ID173	100	600	200	20	0	30	0	0	0.105263	0.631579	0.210526	0.0210526	0	0.0315789	0	0	950	1	0	1	male	22	Czech	62	1.83	18.5135	0	0	1	0	0	C_Descent	A_selfhelp	A_without	belaying	0	0	1	0	0	0	0	0	0	0	0	0	0	0
ID174	100	100	0	0	20	30	0	0	0.4	0.4	0	0	0.08	0.12	0	0	250	0	0	1	male	33	Czech	72	1.72	24.3375	0	0	0	0	0	NA	NA	A_without	NA	0	0	0	0	0	0	0	0	0	0	0	0	0	0
ID175	100	100	0	0	0	30	150	0	0.263158	0.263158	0	0	0	0.0789474	0.394737	0	380	1	0	1	male	43	Czech	125	2.03	30.3332	0	1	0	1	0	B_Climbing	A_selfhelp	A_without	climber	0	0	0	0	0	0	0	0	1	0	0	0	0	0
ID176	100	100	0	20	20	30	0	0	0.37037	0.37037	0	0.0740741	0.0740741	0.111111	0	0	270	1	1	2	male	30	Czech	90	1.89	25.1953	1	0	0	0	0	C_Descent	B_ambulance	B_almost.without	climber	1	0	0	0	0	0	0	0	0	0	0	0	0	0
ID177	100	100	600	20	0	0	80	0	0.111111	0.111111	0.666667	0.0222222	0	0	0.0888889	0	900	1	1	2	male	19	Czech	70	1.79	21.847	1	0	0	0	0	C_Descent	B_ambulance	B_almost.without	climber	1	0	0	0	0	0	0	0	0	0	0	0	0	0
ID178	100	0	100	0	0	0	0	0	0.5	0	0.5	0	0	0	0	0	200	1	1	2	female	37	Czech	65	1.76	20.984	0	0	1	0	0	B_Climbing	B_ambulance	B_almost.without	climber	0	0	0	0	1	0	0	0	0	0	0	0	0	0
ID179	100	100	0	0	0	0	0	0	0.5	0.5	0	0	0	0	0	0	200	1	1	2	female	37	Czech	68	1.68	24.093	1	0	0	0	0	B_Climbing	B_ambulance	A_without	climber	1	0	0	0	0	0	0	0	0	0	0	0	0	0
ID180	600	0	100	20	20	0	0	0	0.810811	0	0.135135	0.027027	0.027027	0	0	0	740	0	0	1	male	23	Czech	68	1.75	22.2041	0	0	0	0	0	NA	NA	NA	NA	0	0	0	0	0	0	0	0	0	0	0	0	0	0
ID181	0	0	0	20	20	0	70	0	0	0	0	0.181818	0.181818	0	0.636364	0	110	1	0	1	male	44	Czech	90	1.87	25.7371	0	0	1	0	0	B_Climbing	A_selfhelp	B_almost.without	others	0	0	0	0	0	0	0	0	0	0	1	0	0	0
ID182	200	100	0	100	60	0	0	0	0.434783	0.217391	0	0.217391	0.130435	0	0	0	460	0	0	1	male	35	Czech	65	1.84	19.199	0	0	0	0	0	NA	NA	NA	NA	0	0	0	0	0	0	0	0	0	0	0	0	0	0
ID183	100	0	0	0	0	0	0	0	1	0	0	0	0	0	0	0	100	0	0	1	female	24	Czech	43	1.77	13.7253	0	0	0	0	0	NA	NA	NA	NA	0	0	0	0	0	0	0	0	0	0	0	0	0	0
ID184	200	200	200	20	20	0	0	0	0.3125	0.3125	0.3125	0.03125	0.03125	0	0	0	640	1	0	1	male	27	Czech	62	1.83	18.5135	0	0	1	0	0	C_Descent	A_selfhelp	A_without	belaying	0	1	0	0	0	0	0	0	0	0	0	0	0	0
ID185	100	0	0	0	0	0	0	0	1	0	0	0	0	0	0	0	100	0	0	1	female	34	Czech	62	1.68	21.9671	0	0	0	0	0	NA	NA	NA	NA	0	0	0	0	0	0	0	0	0	0	0	0	0	0
ID186	100	100	0	20	20	30	0	0	0.37037	0.37037	0	0.0740741	0.0740741	0.111111	0	0	270	0	0	1	male	37	Czech	86	1.78	27.143	0	0	0	0	0	NA	NA	NA	NA	0	0	0	0	0	0	0	0	0	0	0	0	0	0
ID187	300	200	0	100	20	0	0	0	0.483871	0.322581	0	0.16129	0.0322581	0	0	0	620	1	0	1	male	30	Czech	62	1.82	18.7175	0	0	0	0	1	B_Climbing	A_selfhelp	B_almost.without	others	0	0	0	0	0	0	0	0	1	0	0	0	0	0
ID188	100	100	0	0	20	0	0	0	0.454545	0.454545	0	0	0.0909091	0	0	0	220	1	0	1	male	39	Czech	NA	NA	NA	0	0	1	0	0	B_Climbing	A_selfhelp	A_without	others	0	0	0	0	0	0	0	0	0	0	0	0	0	0
ID189	450	450	0	60	0	0	0	0	0.46875	0.46875	0	0.0625	0	0	0	0	960	1	0	1	male	47	Czech	71	1.67	25.4581	0	1	0	1	0	B_Climbing	A_selfhelp	B_almost.without	climber	0	0	0	0	0	0	0	0	0	0	0	0	0	0
ID190	100	100	0	0	0	0	0	0	0.5	0.5	0	0	0	0	0	0	200	0	0	1	male	28	Czech	92	1.84	27.1739	0	0	0	0	0	NA	NA	NA	NA	0	0	0	0	0	0	0	0	0	0	0	0	0	0
ID191	100	0	0	0	0	0	0	0	1	0	0	0	0	0	0	0	100	0	0	1	female	30	Czech	63	1.7	21.7993	0	0	0	0	0	NA	NA	NA	NA	0	0	0	0	0	0	0	0	0	0	0	0	0	0
ID192	200	0	100	0	0	0	0	0	0.666667	0	0.333333	0	0	0	0	0	300	0	0	1	male	31	Czech	77	1.89	21.5559	0	0	0	0	0	NA	NA	NA	NA	0	0	0	0	0	0	0	0	0	0	0	0	0	0
ID193	200	0	0	0	20	0	70	0	0.689655	0	0	0	0.0689655	0	0.241379	0	290	0	0	1	male	23	Czech	72	1.8	22.2222	0	0	0	0	0	NA	NA	NA	NA	0	0	0	0	0	0	0	0	0	0	0	0	0	0
ID194	100	0	0	0	0	0	0	0	1	0	0	0	0	0	0	0	100	1	1	2	female	29	Czech	55	1.63	20.7008	0	1	0	1	0	B_Climbing	B_ambulance	B_almost.without	climber	0	0	1	0	0	0	0	0	0	1	1	0	0	0
ID195	0	450	0	20	20	30	0	0	0	0.865385	0	0.0384615	0.0384615	0.0576923	0	0	520	1	1	2	female	28	Czech	62	1.66	22.4996	0	0	1	0	0	B_Climbing	B_ambulance	A_without	belaying	1	0	0	0	0	0	0	0	0	0	0	0	0	0
ID196	300	200	200	0	0	0	0	0	0.428571	0.285714	0.285714	0	0	0	0	0	700	1	1	2	male	22	Czech	72	1.78	22.7244	0	0	1	0	0	B_Climbing	B_ambulance	B_almost.without	climber	0	0	0	0	0	0	0	0	0	0	0	0	0	0
ID197	100	0	100	20	20	0	0	0	0.416667	0	0.416667	0.0833333	0.0833333	0	0	0	240	3	2	1.66667	female	18	Czech	80	1.8	24.6914	0	0	0	0	1	B_Climbing	B_ambulance	B_almost.without	climber	1	0	0	0	0	0	0	0	0	0	0	0	0	0
ID198	100	100	0	0	20	30	70	0	0.3125	0.3125	0	0	0.0625	0.09375	0.21875	0	320	1	0	1	male	41	Czech	74	1.82	22.3403	0	1	0	1	0	B_Climbing	B_ambulance	A_without	climber	1	0	0	0	0	0	0	0	0	0	0	0	0	0
ID199	100	100	100	20	0	0	0	0	0.3125	0.3125	0.3125	0.0625	0	0	0	0	320	2	1	2	male	29	Czech	68	1.76	21.9525	0	1	0	1	0	B_Climbing	C_hosp.short	A_without	climber	1	0	0	0	0	0	0	0	0	0	0	0	0	0
ID200	0	100	100	20	0	0	0	0	0	0.454545	0.454545	0.0909091	0	0	0	0	220	1	0	1	male	35	Czech	80	1.85	23.3747	0	1	0	1	0	B_Climbing	A_selfhelp	B_almost.without	climber	0	0	0	0	0	0	0	0	1	0	0	0	0	0
ID201	100	100	0	20	0	0	0	0	0.454545	0.454545	0	0.0909091	0	0	0	0	220	0	0	1	male	29	Czech	130	1.96	33.8401	0	0	0	0	0	NA	NA	NA	NA	0	0	0	0	0	0	0	0	0	0	0	0	0	0
ID202	100	0	0	20	0	0	0	0	0.833333	0	0	0.166667	0	0	0	0	120	1	1	2	female	33	Czech	64	1.73	21.3839	0	1	0	1	0	B_Climbing	B_ambulance	A_without	others	0	0	0	1	0	0	0	0	0	0	0	0	0	0
ID203	0	100	100	0	0	0	0	0	0	0.5	0.5	0	0	0	0	0	200	1	1	3	male	28	Slovak	75	1.8	23.1481	0	0	0	0	1	B_Climbing	D_hosp.long	C_longlast	climber	1	0	0	0	0	0	0	0	0	0	0	0	0	0
ID204	100	600	200	20	0	0	0	0	0.108696	0.652174	0.217391	0.0217391	0	0	0	0	920	0	0	1	male	30	Czech	83	1.86	23.9912	0	0	0	0	0	NA	NA	NA	NA	0	0	0	0	0	0	0	0	0	0	0	0	0	0
ID205	100	100	100	60	0	0	0	0	0.277778	0.277778	0.277778	0.166667	0	0	0	0	360	1	1	3	female	33	Czech	45	1.52	19.4771	0	1	0	1	0	NA	A_selfhelp	C_longlast	others	0	0	0	0	0	0	0	0	0	0	1	0	0	0
ID206	600	100	100	20	20	0	0	0	0.714286	0.119048	0.119048	0.0238095	0.0238095	0	0	0	840	1	1	2	male	24	Czech	65	1.71	22.2291	0	1	0	1	0	B_Climbing	B_ambulance	C_longlast	climber	0	0	0	0	0	0	0	0	0	0	0	0	0	1
ID207	0	200	0	0	20	30	0	0	0	0.8	0	0	0.08	0.12	0	0	250	0	0	1	male	69	Czech	80	1.8	24.6914	0	0	0	0	0	NA	NA	NA	NA	0	0	0	0	0	0	0	0	0	0	0	0	0	0
ID208	300	0	0	20	20	0	0	0	0.882353	0	0	0.0588235	0.0588235	0	0	0	340	1	1	2	male	18	Czech	74	1.77	23.6203	0	1	0	1	0	A_Approach	B_ambulance	B_almost.without	others	1	0	0	0	0	0	0	0	0	0	0	0	0	0
ID209	100	100	0	120	20	30	0	0	0.27027	0.27027	0	0.324324	0.0540541	0.0810811	0	0	370	3	2	1.66667	female	36	Czech	65	1.8	20.0617	1	0	0	0	0	B_Climbing	B_ambulance	A_without	others	0	0	0	0	0	0	0	0	0	0	1	0	0	0
ID210	300	100	100	120	0	0	0	0	0.483871	0.16129	0.16129	0.193548	0	0	0	0	620	3	3	3	female	19	Czech	60	1.7	20.7612	0	0	1	0	0	C_Descent	D_hosp.long	D_longlast.serious	belaying	0	0	0	0	0	0	0	0	0	0	0	1	0	0
ID211	100	100	0	10	20	0	70	0	0.333333	0.333333	0	0.0333333	0.0666667	0	0.233333	0	300	1	1	2	female	48	Czech	50	1.6	19.53	0	0	0	0	1	B_Climbing	B_ambulance	A_without	others	0	0	0	0	0	0	0	0	0	0	0	0	0	1
ID212	300	300	200	20	120	90	70	0	0.272727	0.272727	0.181818	0.0181818	0.109091	0.0818182	0.0636364	0	1100	1	1	2	male	21	Czech	95	1.9	26.3158	1	0	0	0	0	B_Climbing	B_ambulance	B_almost.without	climber	1	0	0	0	0	0	0	0	0	0	0	0	0	0
ID213	200	200	100	20	20	0	70	0	0.327869	0.327869	0.163934	0.0327869	0.0327869	0	0.114754	0	610	0	0	1	female	28	Czech	57	1.6	22.2656	0	0	0	0	0	NA	NA	NA	NA	0	0	0	0	0	0	0	0	0	0	0	0	0	0
ID214	200	200	200	60	60	30	0	0	0.266667	0.266667	0.266667	0.08	0.08	0.04	0	0	750	0	0	1	male	29	Slovak	75	1.83	22.3954	0	0	0	0	0	NA	NA	NA	NA	0	0	0	0	0	0	0	0	0	0	0	0	0	0
ID215	0	0	0	0	20	30	150	0	0	0	0	0	0.1	0.15	0.75	0	200	1	0	1	male	35	Slovak	80	1.88	22.6347	0	1	0	1	0	B_Climbing	A_selfhelp	A_without	climber	0	0	0	0	0	1	0	0	0	0	0	0	0	0
ID216	200	100	100	60	60	0	70	0	0.338983	0.169492	0.169492	0.101695	0.101695	0	0.118644	0	590	0	0	1	male	31	Slovak	82	1.82	24.7555	0	0	0	0	0	NA	NA	NA	NA	0	0	0	0	0	0	0	0	0	0	0	0	0	0
ID217	100	200	100	20	20	30	0	0	0.212766	0.425532	0.212766	0.0425532	0.0425532	0.0638298	0	0	470	0	0	1	male	25	Slovak	60	1.61	23.1473	0	0	0	0	0	NA	NA	NA	NA	0	0	0	0	0	0	0	0	0	0	0	0	0	0
ID218	300	200	0	0	20	0	0	0	0.576923	0.384615	0	0	0.0384615	0	0	0	520	1	1	3	male	29	Czech	73	1.83	21.7982	0	0	0	0	1	B_Climbing	C_hosp.short	B_almost.without	others	0	0	0	0	0	0	0	0	1	0	0	0	0	0
ID219	100	200	100	120	120	0	70	0	0.140845	0.28169	0.140845	0.169014	0.169014	0	0.0985915	0	710	1	0	1	male	32	Slovak	75	1.74	24.7721	0	0	0	0	1	B_Climbing	A_selfhelp	B_almost.without	climber	0	0	1	0	0	0	0	1	0	0	0	0	0	0
ID220	200	450	100	120	120	200	70	0	0.15873	0.357143	0.0793651	0.0952381	0.0952381	0.15873	0.0555556	0	1260	1	0	1	male	55	Slovak	75	1.75	24.4898	0	0	0	0	1	A_Approach	A_selfhelp	A_without	others	1	0	0	0	0	0	0	0	0	0	0	0	0	0
ID221	0	0	0	20	20	0	70	0	0	0	0	0.181818	0.181818	0	0.636364	0	110	1	1	3	male	36	Czech	90	1.78	28.4055	0	1	0	1	0	B_Climbing	A_selfhelp	C_longlast	climber	0	0	0	0	0	1	0	0	0	0	0	0	0	0
ID222	100	100	0	0	20	30	0	0	0.4	0.4	0	0	0.08	0.12	0	0	250	1	0	1	female	30	Slovak	55	1.65	20.202	0	0	1	0	0	B_Climbing	A_selfhelp	A_without	climber	0	0	0	0	1	0	0	0	0	0	0	0	0	0
ID223	600	600	0	20	20	0	0	0	0.483871	0.483871	0	0.016129	0.016129	0	0	0	1240	1	0	1	male	35	Slovak	70	1.74	23.1206	0	0	0	0	1	B_Climbing	A_selfhelp	A_without	climber	0	0	0	0	0	1	0	0	0	0	0	0	0	0
ID224	100	100	100	20	20	30	0	0	0.27027	0.27027	0.27027	0.0540541	0.0540541	0.0810811	0	0	370	1	1	2	male	32	Slovak	75	1.72	25.3515	0	0	1	0	0	B_Climbing	B_ambulance	A_without	belaying	0	0	0	0	0	1	0	0	0	0	0	0	0	0
ID225	100	100	100	0	0	0	0	0	0.333333	0.333333	0.333333	0	0	0	0	0	300	1	0	1	male	35	Slovak	76	1.73	25.3934	0	1	0	1	0	B_Climbing	A_selfhelp	A_without	climber	0	0	0	0	0	0	0	0	0	0	1	0	0	0
ID226	300	100	0	20	20	0	0	0	0.681818	0.227273	0	0.0454545	0.0454545	0	0	0	440	0	0	1	male	23	Slovak	87	1.78	27.4587	0	0	0	0	0	NA	NA	NA	NA	0	0	0	0	0	0	0	0	0	0	0	0	0	0
ID227	200	200	0	20	20	0	0	0	0.454545	0.454545	0	0.0454545	0.0454545	0	0	0	440	0	0	1	female	22	Slovak	61	1.7	21.1073	0	0	0	0	0	NA	NA	NA	NA	0	0	0	0	0	0	0	0	0	0	0	0	0	0
ID228	0	100	0	0	20	30	0	0	0	0.666667	0	0	0.133333	0.2	0	0	150	0	0	1	male	21	Slovak	73	1.83	21.7982	0	0	0	0	0	NA	NA	NA	NA	0	0	0	0	0	0	0	0	0	0	0	0	0	0
ID229	100	100	0	0	0	0	150	0	0.285714	0.285714	0	0	0	0	0.428571	0	350	1	1	2	female	24	Slovak	67	1.7	23.1834	0	0	0	0	1	C_Descent	B_ambulance	A_without	belaying	1	0	0	0	0	0	0	0	0	0	0	0	0	0
ID230	100	100	0	20	20	30	0	0	0.37037	0.37037	0	0.0740741	0.0740741	0.111111	0	0	270	1	0	1	male	21	Slovak	74	1.84	21.8573	1	0	0	0	0	B_Climbing	A_selfhelp	A_without	climber	0	0	0	0	0	0	0	0	0	0	1	0	0	0
ID231	200	200	200	20	0	30	150	0	0.25	0.25	0.25	0.025	0	0.0375	0.1875	0	800	0	0	1	male	23	Slovak	70	1.75	22.8571	0	0	0	0	0	NA	NA	NA	NA	0	0	0	0	0	0	0	0	0	0	0	0	0	0
ID232	100	200	0	20	20	30	0	0	0.27027	0.540541	0	0.0540541	0.0540541	0.0810811	0	0	370	2	2	2.5	female	34	Slovak	50	1.67	17.9282	0	0	0	0	1	C_Descent	B_ambulance	A_without	climber	0	0	0	0	0	0	0	0	0	0	0	0	1	0
ID233	0	100	0	20	20	30	70	0	0	0.416667	0	0.0833333	0.0833333	0.125	0.291667	0	240	1	0	1	male	38	Czech	82	1.8	25.3086	0	1	0	1	0	B_Climbing	A_selfhelp	B_almost.without	climber	1	0	0	0	0	0	0	0	0	0	0	0	0	0
ID234	500	600	0	60	60	30	0	0	0.4	0.48	0	0.048	0.048	0.024	0	0	1250	2	0	1	male	34	Slovak	102	1.88	28.8592	0	0	0	0	1	C_Descent	A_selfhelp	C_longlast	others	1	0	0	0	0	0	0	1	0	0	0	0	0	0
ID235	200	300	0	20	60	30	70	0	0.294118	0.441176	0	0.0294118	0.0882353	0.0441176	0.102941	0	680	1	1	2	male	25	Czech	85	1.82	25.6612	0	1	0	1	0	C_Descent	B_ambulance	A_without	belaying	1	0	0	0	0	0	0	0	0	0	0	0	0	0
ID236	100	100	200	100	20	0	0	0	0.192308	0.192308	0.384615	0.192308	0.0384615	0	0	0	520	0	0	1	male	45	Czech	90	1.93	24.1617	0	0	0	0	0	NA	NA	NA	NA	0	0	0	0	0	0	0	0	0	0	0	0	0	0
ID237	0	200	0	20	20	30	0	0	0	0.740741	0	0.0740741	0.0740741	0.111111	0	0	270	3	1	1.33333	male	29	Slovak	80	1.81	24.4193	0	1	0	1	0	B_Climbing	A_selfhelp	B_almost.without	others	1	0	0	0	0	0	0	0	0	0	0	0	0	0
ID238	0	0	0	20	20	0	0	0	0	0	0	0.5	0.5	0	0	0	40	2	2	2	male	41	Slovak	78	1.81	23.8088	0	1	0	1	0	A_Approach	B_ambulance	A_without	belaying	0	0	0	0	0	0	0	0	0	0	1	0	0	0
ID239	450	100	100	100	20	0	0	0	0.584416	0.12987	0.12987	0.12987	0.025974	0	0	0	770	1	1	2	male	34	Slovak	84	1.85	24.5435	0	1	0	1	0	B_Climbing	B_ambulance	B_almost.without	climber	0	0	0	0	0	0	0	0	0	0	0	0	0	0
ID240	0	200	100	20	60	30	0	0	0	0.487805	0.243902	0.0487805	0.146341	0.0731707	0	0	410	1	0	1	male	29	Slovak	73	1.79	22.7833	0	0	0	0	1	B_Climbing	A_selfhelp	A_without	climber	0	0	0	0	0	1	0	0	0	0	0	0	0	0
ID241	200	600	0	0	60	30	0	0	0.224719	0.674157	0	0	0.0674157	0.0337079	0	0	890	1	0	1	male	23	Slovak	73	1.75	23.8367	0	1	0	1	0	B_Climbing	A_selfhelp	A_without	climber	0	0	0	0	0	0	0	0	0	0	1	0	0	0
ID242	300	300	0	60	20	30	0	0	0.422535	0.422535	0	0.084507	0.028169	0.0422535	0	0	710	1	1	2	male	40	Slovak	72	1.7	24.9135	0	1	0	1	0	B_Climbing	B_ambulance	B_almost.without	climber	1	0	0	0	0	0	0	0	0	0	0	0	0	0
ID243	100	200	0	60	20	30	0	0	0.243902	0.487805	0	0.146341	0.0487805	0.0731707	0	0	410	1	0	1	female	30	Slovak	NA	NA	NA	0	1	0	1	0	C_Descent	A_selfhelp	A_without	others	1	0	0	0	0	0	0	0	0	0	0	0	0	0
ID244	200	200	200	120	20	30	0	0	0.25974	0.25974	0.25974	0.155844	0.025974	0.038961	0	0	770	0	0	1	female	29	Czech	67	1.72	22.6474	0	0	0	0	0	NA	NA	NA	NA	0	0	0	0	0	0	0	0	0	0	0	0	0	0
ID245	300	450	0	60	20	0	0	0	0.361446	0.542169	0	0.0722892	0.0240964	0	0	0	830	2	0	1	female	23	Czech	63	1.84	18.6082	0	0	1	0	0	B_Climbing	A_selfhelp	A_without	others	0	0	0	0	0	0	0	0	0	0	1	0	0	0
ID246	100	100	0	20	0	0	0	0	0.454545	0.454545	0	0.0909091	0	0	0	0	220	2	2	2.5	male	39	Czech	80	1.64	29.7442	0	0	0	0	1	B_Climbing	C_hosp.short	A_without	climber	0	0	1	0	0	0	0	1	0	0	0	0	0	0
ID247	600	600	300	20	20	30	0	0	0.382166	0.382166	0.191083	0.0127389	0.0127389	0.0191083	0	0	1570	1	1	3	male	55	Czech	72	1.75	23.5102	0	1	0	0	0	B_Climbing	D_hosp.long	B_almost.without	climber	0	0	0	0	0	0	0	0	0	0	0	0	0	1
ID248	0	100	0	20	0	30	0	0	0	0.666667	0	0.133333	0	0.2	0	0	150	1	0	1	male	51	Czech	114	1.85	33.309	0	1	0	1	0	B_Climbing	A_selfhelp	A_without	climber	1	0	0	0	0	0	0	0	0	0	0	0	0	0
ID249	100	300	0	60	0	0	0	0	0.217391	0.652174	0	0.130435	0	0	0	0	460	1	1	2	male	45	Czech	80	1.74	26.4236	0	0	0	0	1	B_Climbing	B_ambulance	B_almost.without	others	0	0	0	0	0	0	0	0	0	0	1	0	0	0
ID250	100	450	0	20	0	0	0	0	0.175439	0.789474	0	0.0350877	0	0	0	0	570	0	0	1	female	20	Slovak	50	1.7	17.301	0	0	0	0	0	NA	NA	NA	NA	0	0	0	0	0	0	0	0	0	0	0	0	0	0
ID251	100	300	0	60	20	30	70	0	0.172414	0.517241	0	0.103448	0.0344828	0.0517241	0.12069	0	580	2	1	2	female	29	Czech	50	1.65	18.3655	1	0	0	0	0	C_Descent	B_ambulance	A_without	climber	1	0	0	0	0	0	0	0	0	0	0	0	0	0
ID252	300	450	100	20	20	30	70	0	0.30303	0.454545	0.10101	0.020202	0.020202	0.030303	0.0707071	0	990	3	1	1.33333	female	38	Czech	76	1.73	25.3934	0	1	0	1	0	A_Approach	B_ambulance	A_without	others	0	0	0	0	0	0	0	0	0	0	1	0	0	0
ID253	600	450	100	20	20	0	0	0	0.504202	0.378151	0.0840336	0.0168067	0.0168067	0	0	0	1190	1	1	2	male	27	Czech	83	1.77	26.493	1	0	0	0	0	B_Climbing	B_ambulance	B_almost.without	climber	0	0	0	0	0	0	0	0	0	0	1	0	0	0
ID254	450	0	100	0	0	0	0	0	0.818182	0	0.181818	0	0	0	0	0	550	1	0	1	male	29	Czech	78	1.98	19.8959	0	0	1	0	0	B_Climbing	A_selfhelp	B_almost.without	others	0	0	0	0	0	0	0	0	0	0	1	0	0	0
ID255	100	100	100	120	20	0	0	0	0.227273	0.227273	0.227273	0.272727	0.0454545	0	0	0	440	3	3	2.33333	male	27	Czech	100	1.83	29.8606	0	1	0	1	0	C_Descent	C_hosp.short	A_without	others	0	1	0	0	0	0	0	0	0	0	0	0	0	0
ID256	450	200	450	20	20	0	70	0	0.371901	0.165289	0.371901	0.0165289	0.0165289	0	0.0578512	0	1210	3	3	2	male	24	Czech	68	1.78	21.4619	0	0	1	0	0	B_Climbing	B_ambulance	C_longlast	others	0	0	0	0	0	0	0	0	0	0	0	0	0	0
ID257	300	300	300	20	20	0	0	0	0.319149	0.319149	0.319149	0.0212766	0.0212766	0	0	0	940	2	1	1.5	female	31	Czech	47	1.53	20.0777	0	0	1	0	0	B_Climbing	A_selfhelp	A_without	others	0	0	0	0	0	0	0	0	0	0	0	0	0	1
ID258	300	200	300	60	60	0	0	0	0.326087	0.217391	0.326087	0.0652174	0.0652174	0	0	0	920	1	0	1	male	29	Czech	90	1.81	27.4717	0	0	1	0	0	B_Climbing	A_selfhelp	B_almost.without	climber	0	0	0	0	1	0	0	0	0	0	0	0	0	0
ID259	450	200	0	20	0	0	0	0	0.671642	0.298507	0	0.0298507	0	0	0	0	670	2	1	2	female	21	Czech	55	1.62	20.9572	1	0	0	0	0	B_Climbing	D_hosp.long	C_longlast	climber	1	0	0	0	0	0	0	0	0	0	0	0	0	0
ID260	100	100	100	0	20	0	0	0	0.3125	0.3125	0.3125	0	0.0625	0	0	0	320	0	0	1	male	53	Czech	90	1.85	26.2966	0	0	0	0	0	NA	NA	NA	NA	0	0	0	0	0	0	0	0	0	0	0	0	0	0
ID261	100	200	0	0	0	0	0	0	0.333333	0.666667	0	0	0	0	0	0	300	1	1	2	male	40	Czech	90	1.93	24.1617	0	1	0	1	0	B_Climbing	B_ambulance	A_without	climber	0	0	0	0	0	1	0	0	0	0	0	0	0	0
ID262	300	450	0	20	60	0	0	0	0.361446	0.542169	0	0.0240964	0.0722892	0	0	0	830	1	1	2	male	34	Czech	82	1.8	25.3086	0	0	1	0	0	B_Climbing	B_ambulance	A_without	climber	0	0	0	0	0	0	0	0	0	0	1	0	0	0
ID263	100	0	0	20	20	30	0	0	0.588235	0	0	0.117647	0.117647	0.176471	0	0	170	1	1	2	male	37	Czech	70	1.73	23.3887	0	0	0	0	1	B_Climbing	B_ambulance	B_almost.without	others	1	0	0	0	0	0	0	0	0	0	0	0	0	0
ID264	100	450	0	60	60	30	70	0	0.12987	0.584416	0	0.0779221	0.0779221	0.038961	0.0909091	0	770	1	0	1	male	29	Czech	70	1.77	22.3435	0	0	0	0	1	B_Climbing	A_selfhelp	B_almost.without	climber	0	0	0	0	1	0	0	0	0	0	0	0	0	1
ID265	300	300	0	60	20	0	70	0	0.4	0.4	0	0.08	0.0266667	0	0.0933333	0	750	3	2	1.66667	male	19	Czech	60	1.63	22.5827	0	0	1	0	0	B_Climbing	B_ambulance	B_almost.without	climber	0	1	0	0	0	0	0	0	0	0	0	0	0	0
ID266	200	300	100	100	20	30	70	0	0.243902	0.365854	0.121951	0.121951	0.0243902	0.0365854	0.0853659	0	820	3	3	2.33333	male	32	Czech	81	1.9	22.4377	0	1	0	1	0	B_Climbing	D_hosp.long	B_almost.without	belaying	0	0	1	0	0	0	0	1	0	1	0	0	0	0
ID267	450	450	0	60	0	30	0	0	0.454545	0.454545	0	0.0606061	0	0.030303	0	0	990	1	0	1	male	39	Czech	84	1.79	26.2164	0	1	0	1	0	B_Climbing	A_selfhelp	A_without	climber	0	0	0	0	0	0	0	0	0	0	1	0	0	0
ID268	100	100	100	20	20	0	0	0	0.294118	0.294118	0.294118	0.0588235	0.0588235	0	0	0	340	1	1	2	male	42	Czech	72	1.72	24.3375	1	0	0	0	0	B_Climbing	B_ambulance	B_almost.without	others	0	0	0	0	0	0	0	0	0	0	1	0	0	0
ID269	100	100	200	0	0	0	0	0	0.25	0.25	0.5	0	0	0	0	0	400	1	0	1	male	26	Czech	100	1.95	26.2985	0	0	0	0	0	NA	NA	B_almost.without	others	0	0	0	0	0	0	0	0	0	0	1	0	0	0
ID270	450	0	300	0	0	0	0	0	0.6	0	0.4	0	0	0	0	0	750	3	3	2	male	36	Czech	66	1.82	19.9251	0	0	1	0	0	B_Climbing	B_ambulance	C_longlast	others	0	0	0	0	0	0	0	0	0	0	0	0	0	0
ID271	300	300	300	20	20	0	0	0	0.319149	0.319149	0.319149	0.0212766	0.0212766	0	0	0	940	1	1	3	female	31	Czech	47	1.53	20.0777	1	0	0	0	0	B_Climbing	C_hosp.short	A_without	others	0	0	0	0	0	0	0	0	0	0	0	0	0	0
ID272	0	600	200	20	20	30	0	0	0	0.689655	0.229885	0.0229885	0.0229885	0.0344828	0	0	870	2	1	1.5	male	22	Czech	62	1.84	18.3009	0	0	1	0	0	B_Climbing	A_selfhelp	A_without	belaying	0	0	0	0	0	0	0	0	0	0	1	0	0	0
ID273	0	0	0	20	20	0	0	0	0	0	0	0.5	0.5	0	0	0	40	1	1	2	female	42	Czech	66	1.65	24.2424	0	1	0	1	0	B_Climbing	B_ambulance	B_almost.without	climber	1	0	0	0	0	0	0	0	0	0	0	0	0	0
ID274	0	100	0	20	20	0	150	300	0	0.169492	0	0.0338983	0.0338983	0	0.254237	0.508475	590	1	1	2	male	41	Czech	85	1.85	24.8356	0	0	1	0	0	B_Climbing	B_ambulance	A_without	climber	0	0	0	0	0	0	0	0	0	0	1	0	0	0
ID275	100	200	0	100	60	30	0	0	0.204082	0.408163	0	0.204082	0.122449	0.0612245	0	0	490	1	1	3	female	42	Czech	53	1.59	20.9644	0	0	1	0	0	B_Climbing	C_hosp.short	B_almost.without	climber	0	0	0	0	0	1	0	0	0	0	0	0	0	0
ID276	100	300	0	120	20	0	0	0	0.185185	0.555556	0	0.222222	0.037037	0	0	0	540	1	0	1	male	39	Czech	74	1.76	23.8895	1	0	0	0	0	B_Climbing	A_selfhelp	A_without	climber	0	0	0	0	0	0	0	0	0	0	1	0	0	0
ID277	200	300	0	60	0	30	0	0	0.338983	0.508475	0	0.101695	0	0.0508475	0	0	590	1	0	1	female	28	Czech	59	1.72	19.9432	0	0	1	0	0	A_Approach	A_selfhelp	A_without	climber	0	0	0	0	0	0	0	0	0	0	1	0	0	0
ID278	200	200	200	100	60	0	70	0	0.240964	0.240964	0.240964	0.120482	0.0722892	0	0.0843373	0	830	1	0	1	male	26	Czech	85	1.85	24.8356	1	0	0	0	0	B_Climbing	B_ambulance	B_almost.without	climber	1	0	0	0	0	0	0	0	0	0	0	0	0	0
ID279	300	100	0	20	20	0	0	0	0.681818	0.227273	0	0.0454545	0.0454545	0	0	0	440	0	0	1	female	29	Czech	56	1.61	21.6041	0	0	0	0	0	NA	NA	NA	NA	0	0	0	0	0	0	0	0	0	0	0	0	0	0
ID280	200	100	0	60	0	0	0	0	0.555556	0.277778	0	0.166667	0	0	0	0	360	3	2	1.66667	female	23	Czech	53	1.58	21.2306	1	0	0	0	0	B_Climbing	B_ambulance	A_without	climber	0	0	0	0	0	0	0	0	0	0	1	0	0	0
ID281	100	0	100	60	20	0	0	0	0.357143	0	0.357143	0.214286	0.0714286	0	0	0	280	1	1	2	female	18	Czech	80	1.8	24.6914	0	1	0	1	0	NA	B_ambulance	B_almost.without	others	0	0	0	0	0	0	0	0	0	0	0	0	0	1
ID282	0	300	0	20	0	0	0	0	0	0.9375	0	0.0625	0	0	0	0	320	1	1	2	female	29	Czech	50	1.63	18.8189	1	0	0	0	0	B_Climbing	B_ambulance	A_without	others	1	0	0	0	0	0	0	0	0	0	0	0	0	0
ID283	100	100	100	0	0	0	0	0	0.333333	0.333333	0.333333	0	0	0	0	0	300	1	1	2	female	28	Czech	73	1.73	24.3911	0	1	0	1	0	B_Climbing	B_ambulance	B_almost.without	others	1	0	0	0	0	0	0	0	0	0	0	0	0	0
ID284	450	450	0	120	120	90	0	0	0.365854	0.365854	0	0.097561	0.097561	0.0731707	0	0	1230	1	1	2	male	50	Czech	82	1.79	25.5922	0	1	0	1	0	B_Climbing	B_ambulance	B_almost.without	climber	1	0	0	0	0	0	0	0	0	0	0	0	0	0
ID285	0	0	0	20	20	0	0	0	0	0	0	0.5	0.5	0	0	0	40	1	0	1	male	21	Slovak	70	1.8	21.6049	0	1	0	1	0	B_Climbing	A_selfhelp	C_longlast	others	0	0	0	0	0	0	0	0	0	0	0	0	1	0
ID286	300	200	100	120	120	0	0	0	0.357143	0.238095	0.119048	0.142857	0.142857	0	0	0	840	0	0	1	male	17	Czech	62	1.72	20.9573	0	0	0	0	0	NA	NA	NA	NA	0	0	0	0	0	0	0	0	0	0	0	0	0	0
ID287	100	200	0	60	0	0	0	0	0.277778	0.555556	0	0.166667	0	0	0	0	360	1	1	3	female	35	Czech	68	1.64	25.2826	1	0	0	0	0	B_Climbing	C_hosp.short	B_almost.without	climber	0	0	0	0	1	0	0	0	0	0	0	0	0	0
ID288	100	0	200	0	0	0	0	0	0.333333	0	0.666667	0	0	0	0	0	300	3	1	2.66667	male	30	Czech	85	1.85	24.8356	1	0	0	0	0	B_Climbing	B_ambulance	B_almost.without	climber	0	0	0	0	0	0	0	0	0	0	1	0	0	0
ID289	450	450	450	120	12	0	0	0	0.303644	0.303644	0.303644	0.0809717	0.00809717	0	0	0	1482	3	0	1	male	31	Czech	88	1.91	24.1221	0	1	0	1	0	A_Approach	A_selfhelp	C_longlast	belaying	1	0	0	0	0	0	0	0	0	0	0	0	0	0
ID290	100	300	0	20	0	0	0	0	0.238095	0.714286	0	0.047619	0	0	0	0	420	2	0	1	female	34	Czech	66	1.76	21.3068	1	0	0	0	0	B_Climbing	A_selfhelp	A_without	climber	0	0	0	0	0	0	0	0	0	0	1	0	0	0
ID291	0	100	300	0	0	0	0	0	0	0.25	0.75	0	0	0	0	0	400	1	1	3	female	18	Czech	52	1.68	18.424	1	0	0	0	0	B_Climbing	D_hosp.long	B_almost.without	climber	1	0	0	0	0	0	0	0	0	0	0	0	0	0
ID292	0	100	100	0	0	0	0	0	0	0.5	0.5	0	0	0	0	0	200	2	1	1.5	male	32	Czech	62	1.73	20.7157	0	1	0	1	0	C_Descent	B_ambulance	B_almost.without	climber	0	1	0	0	0	0	0	0	0	0	0	0	0	0
ID293	300	0	200	0	0	0	0	0	0.6	0	0.4	0	0	0	0	0	500	0	0	1	male	29	Czech	72	1.83	21.4996	0	0	0	0	0	NA	NA	NA	NA	0	0	0	0	0	0	0	0	0	0	0	0	0	0
ID294	100	0	0	0	0	0	0	0	1	0	0	0	0	0	0	0	100	1	1	2	male	23	Czech	78	1.85	22.7904	0	0	0	0	1	C_Descent	B_ambulance	A_without	others	0	0	1	0	0	0	0	0	0	0	0	0	0	0
ID295	450	450	100	60	60	0	0	0	0.401786	0.401786	0.0892857	0.0535714	0.0535714	0	0	0	1120	1	0	1	female	60	Czech	58	1.57	23.5304	0	0	0	0	1	B_Climbing	A_selfhelp	A_without	climber	1	0	0	0	0	0	0	0	0	0	0	0	0	0
ID296	100	0	0	60	20	0	0	0	0.555556	0	0	0.333333	0.111111	0	0	0	180	0	0	1	male	28	Czech	70	1.76	22.5981	0	0	0	0	0	NA	NA	NA	NA	0	0	0	0	0	0	0	0	0	0	0	0	0	0
ID297	300	100	100	0	20	0	70	0	0.508475	0.169492	0.169492	0	0.0338983	0	0.118644	0	590	0	0	1	female	23	Slovak	78	1.7	22.4913	0	0	0	0	0	NA	NA	NA	NA	0	0	0	0	0	0	0	0	0	0	0	0	0	0
ID298	300	100	0	20	20	0	70	0	0.588235	0.196078	0	0.0392157	0.0392157	0	0.137255	0	510	1	1	2	female	36	Czech	75	1.65	27.55	0	0	0	0	1	B_Climbing	B_ambulance	B_almost.without	others	0	0	0	0	0	1	0	0	0	0	0	0	0	0
ID299	300	100	0	20	20	0	70	0	0.588235	0.196078	0	0.0392157	0.0392157	0	0.137255	0	510	1	1	2	male	43	Czech	75	1.76	24.21	0	0	0	0	1	B_Climbing	B_ambulance	B_almost.without	others	0	0	1	0	0	0	0	0	0	0	0	0	0	0
ID300	200	600	0	0	60	30	0	0	0.224719	0.674157	0	0	0.0674157	0.0337079	0	0	890	1	0	1	male	23	Slovak	73	1.75	23.8367	0	1	0	1	0	B_Climbing	A_selfhelp	A_without	climber	0	0	0	0	0	0	0	0	0	0	1	0	0	0
ID301	300	300	0	60	20	30	0	0	0.422535	0.422535	0	0.084507	0.028169	0.0422535	0	0	710	1	1	2	male	40	Slovak	72	1.7	24.9135	0	1	0	1	0	B_Climbing	B_ambulance	B_almost.without	climber	1	0	0	0	0	0	0	0	0	0	0	0	0	0
ID302	100	200	0	60	20	30	0	0	0.243902	0.487805	0	0.146341	0.0487805	0.0731707	0	0	410	1	0	1	female	30	Slovak	NA	NA	NA	0	1	0	1	0	C_Descent	A_selfhelp	A_without	others	1	0	0	0	0	0	0	0	0	0	0	0	0	0
ID303	200	200	200	120	20	30	0	0	0.25974	0.25974	0.25974	0.155844	0.025974	0.038961	0	0	770	0	0	1	female	29	Czech	67	1.72	22.6474	0	0	0	0	0	NA	NA	NA	NA	0	0	0	0	0	0	0	0	0	0	0	0	0	0
ID304	300	450	0	60	20	0	0	0	0.361446	0.542169	0	0.0722892	0.0240964	0	0	0	830	2	0	1	female	23	Czech	63	1.84	18.6082	0	0	1	0	0	B_Climbing	A_selfhelp	A_without	others	0	0	0	0	0	0	0	0	0	0	1	0	0	0
ID305	100	100	0	20	0	0	0	0	0.454545	0.454545	0	0.0909091	0	0	0	0	220	2	2	2.5	male	39	Czech	80	1.64	29.7442	0	0	0	0	1	B_Climbing	C_hosp.short	A_without	climber	0	0	1	0	0	0	0	1	0	0	0	0	0	0
ID306	600	600	300	20	20	30	0	0	0.382166	0.382166	0.191083	0.0127389	0.0127389	0.0191083	0	0	1570	1	1	3	male	55	Czech	72	1.75	23.5102	0	1	0	0	0	B_Climbing	D_hosp.long	B_almost.without	climber	0	0	0	0	0	0	0	0	0	0	0	0	0	1
ID307	0	100	0	20	0	30	0	0	0	0.666667	0	0.133333	0	0.2	0	0	150	1	0	1	male	51	Czech	114	1.85	33.309	0	1	0	1	0	B_Climbing	A_selfhelp	A_without	climber	1	0	0	0	0	0	0	0	0	0	0	0	0	0
ID308	100	300	0	60	0	0	0	0	0.217391	0.652174	0	0.130435	0	0	0	0	460	1	1	2	male	45	Czech	80	1.74	26.4236	0	0	0	0	1	B_Climbing	B_ambulance	B_almost.without	others	0	0	0	0	0	0	0	0	0	0	1	0	0	0
ID309	100	450	0	20	0	0	0	0	0.175439	0.789474	0	0.0350877	0	0	0	0	570	0	0	1	female	20	Slovak	50	1.7	17.301	0	0	0	0	0	NA	NA	NA	NA	0	0	0	0	0	0	0	0	0	0	0	0	0	0
ID310	100	300	0	60	20	30	70	0	0.172414	0.517241	0	0.103448	0.0344828	0.0517241	0.12069	0	580	2	2	2	female	29	Czech	50	1.65	18.3655	1	0	0	0	0	C_Descent	B_ambulance	A_without	climber	1	0	0	0	0	0	0	0	0	0	0	0	0	0
ID311	300	450	100	20	20	30	70	0	0.30303	0.454545	0.10101	0.020202	0.020202	0.030303	0.0707071	0	990	3	1	1.33333	female	38	Czech	76	1.73	25.3934	0	1	0	1	0	A_Approach	B_ambulance	A_without	others	0	0	0	0	0	0	0	0	0	0	1	0	0	0
ID312	600	450	100	20	20	0	0	0	0.504202	0.378151	0.0840336	0.0168067	0.0168067	0	0	0	1190	1	1	2	male	27	Czech	83	1.77	26.493	1	0	0	0	0	B_Climbing	B_ambulance	B_almost.without	climber	0	0	0	0	0	0	0	0	0	0	1	0	0	0
ID313	450	0	100	0	0	0	0	0	0.818182	0	0.181818	0	0	0	0	0	550	1	0	1	male	29	Czech	78	1.98	19.8959	0	0	1	0	0	B_Climbing	A_selfhelp	B_almost.without	others	0	0	0	0	0	0	0	0	0	0	1	0	0	0
ID314	100	100	100	120	20	0	0	0	0.227273	0.227273	0.227273	0.272727	0.0454545	0	0	0	440	3	3	2.33333	male	27	Czech	100	1.83	29.8606	0	1	0	1	0	C_Descent	C_hosp.short	A_without	others	0	1	0	0	0	0	0	0	0	0	0	0	0	0
ID315	450	200	450	20	20	0	70	0	0.371901	0.165289	0.371901	0.0165289	0.0165289	0	0.0578512	0	1210	3	3	2	male	24	Czech	68	1.78	21.4619	0	0	1	0	0	B_Climbing	B_ambulance	C_longlast	others	0	0	0	0	0	0	0	0	0	0	0	0	0	0
ID316	300	300	300	20	20	0	0	0	0.319149	0.319149	0.319149	0.0212766	0.0212766	0	0	0	940	2	1	1.5	female	31	Czech	47	1.53	20.0777	0	0	1	0	0	B_Climbing	A_selfhelp	A_without	others	0	0	0	0	0	0	0	0	0	0	0	0	0	1
ID317	300	200	300	60	60	0	0	0	0.326087	0.217391	0.326087	0.0652174	0.0652174	0	0	0	920	1	0	1	male	29	Czech	90	1.81	27.4717	0	0	1	0	0	B_Climbing	A_selfhelp	B_almost.without	climber	0	0	0	0	1	0	0	0	0	0	0	0	0	0
ID318	450	200	0	20	0	0	0	0	0.671642	0.298507	0	0.0298507	0	0	0	0	670	2	1	2	female	21	Czech	55	1.62	20.9572	1	0	0	0	0	B_Climbing	D_hosp.long	C_longlast	climber	1	0	0	0	0	0	0	0	0	0	0	0	0	0
ID319	100	100	100	0	20	0	0	0	0.3125	0.3125	0.3125	0	0.0625	0	0	0	320	0	0	1	male	53	Czech	90	1.85	26.2966	0	0	0	0	0	NA	NA	NA	NA	0	0	0	0	0	0	0	0	0	0	0	0	0	0
ID320	100	200	0	0	0	0	0	0	0.333333	0.666667	0	0	0	0	0	0	300	1	1	2	male	40	Czech	90	1.93	24.1617	0	1	0	1	0	B_Climbing	B_ambulance	A_without	climber	0	0	0	0	0	1	0	0	0	0	0	0	0	0
ID321	300	450	0	20	60	0	0	0	0.361446	0.542169	0	0.0240964	0.0722892	0	0	0	830	1	1	2	male	34	Czech	82	1.8	25.3086	0	0	1	0	0	B_Climbing	B_ambulance	A_without	climber	0	0	0	0	0	0	0	0	0	0	1	0	0	0
ID322	100	0	0	20	20	30	0	0	0.588235	0	0	0.117647	0.117647	0.176471	0	0	170	1	1	2	male	37	Czech	70	1.73	23.3887	0	0	0	0	1	B_Climbing	B_ambulance	B_almost.without	others	1	0	0	0	0	0	0	0	0	0	0	0	0	0
ID323	100	450	0	60	60	30	70	0	0.12987	0.584416	0	0.0779221	0.0779221	0.038961	0.0909091	0	770	1	0	1	male	29	Czech	70	1.77	22.3435	0	0	0	0	1	B_Climbing	A_selfhelp	B_almost.without	climber	0	0	0	0	1	0	0	0	0	0	0	0	0	1
ID324	300	300	0	60	20	0	70	0	0.4	0.4	0	0.08	0.0266667	0	0.0933333	0	750	3	2	1.66667	male	19	Czech	60	1.63	22.5827	0	0	1	0	0	B_Climbing	B_ambulance	B_almost.without	climber	0	1	0	0	0	0	0	0	0	0	0	0	0	0
ID325	200	300	100	100	20	30	70	0	0.243902	0.365854	0.121951	0.121951	0.0243902	0.0365854	0.0853659	0	820	3	3	2.33333	male	32	Czech	81	1.9	22.4377	0	1	0	1	0	B_Climbing	D_hosp.long	B_almost.without	belaying	0	0	1	0	0	0	0	1	0	1	0	0	0	0
ID326	450	450	0	60	0	30	0	0	0.454545	0.454545	0	0.0606061	0	0.030303	0	0	990	1	0	1	male	39	Czech	84	1.79	26.2164	0	1	0	1	0	B_Climbing	A_selfhelp	A_without	climber	0	0	0	0	0	0	0	0	0	0	1	0	0	0
ID327	100	100	100	20	20	0	0	0	0.294118	0.294118	0.294118	0.0588235	0.0588235	0	0	0	340	1	1	2	male	42	Czech	72	1.72	24.3375	1	0	0	0	0	B_Climbing	B_ambulance	B_almost.without	others	0	0	0	0	0	0	0	0	0	0	1	0	0	0
ID328	100	100	200	0	0	0	0	0	0.25	0.25	0.5	0	0	0	0	0	400	1	0	1	male	26	Czech	100	1.95	26.2985	0	0	0	0	0	NA	NA	B_almost.without	others	0	0	0	0	0	0	0	0	0	0	1	0	0	0
ID329	450	0	300	0	0	0	0	0	0.6	0	0.4	0	0	0	0	0	750	3	3	2	male	36	Czech	66	1.82	19.9251	0	0	1	0	0	B_Climbing	B_ambulance	C_longlast	others	0	0	0	0	0	0	0	0	0	0	0	0	0	0
ID330	300	300	300	20	20	0	0	0	0.319149	0.319149	0.319149	0.0212766	0.0212766	0	0	0	940	1	1	3	female	31	Czech	47	1.53	20.0777	1	0	0	0	0	B_Climbing	C_hosp.short	A_without	others	0	0	0	0	0	0	0	0	0	0	0	0	0	0
ID331	0	600	200	20	20	30	0	0	0	0.689655	0.229885	0.0229885	0.0229885	0.0344828	0	0	870	2	1	1.5	male	22	Czech	62	1.84	18.3009	0	0	1	0	0	B_Climbing	A_selfhelp	A_without	belaying	0	0	0	0	0	0	0	0	0	0	1	0	0	0
ID332	0	0	0	20	20	0	0	0	0	0	0	0.5	0.5	0	0	0	40	1	1	2	female	42	Czech	66	1.65	24.2424	0	1	0	1	0	B_Climbing	B_ambulance	B_almost.without	climber	1	0	0	0	0	0	0	0	0	0	0	0	0	0
ID333	0	100	0	20	20	0	150	300	0	0.169492	0	0.0338983	0.0338983	0	0.254237	0.508475	590	1	1	2	male	41	Czech	85	1.85	24.8356	0	0	1	0	0	B_Climbing	B_ambulance	A_without	climber	0	0	0	0	0	0	0	0	0	0	1	0	0	0
ID334	100	200	0	100	60	30	0	0	0.204082	0.408163	0	0.204082	0.122449	0.0612245	0	0	490	1	1	3	female	42	Czech	53	1.59	20.9644	0	0	1	0	0	B_Climbing	C_hosp.short	B_almost.without	climber	0	0	0	0	0	1	0	0	0	0	0	0	0	0
ID335	100	300	0	120	20	0	0	0	0.185185	0.555556	0	0.222222	0.037037	0	0	0	540	1	0	1	male	39	Czech	74	1.76	23.8895	1	0	0	0	0	B_Climbing	A_selfhelp	A_without	climber	0	0	0	0	0	0	0	0	0	0	1	0	0	0
ID336	200	300	0	60	0	30	0	0	0.338983	0.508475	0	0.101695	0	0.0508475	0	0	590	1	0	1	female	28	Czech	59	1.72	19.9432	0	0	1	0	0	A_Approach	A_selfhelp	A_without	climber	0	0	0	0	0	0	0	0	0	0	1	0	0	0
ID337	200	200	200	100	60	0	70	0	0.240964	0.240964	0.240964	0.120482	0.0722892	0	0.0843373	0	830	1	1	2	male	26	Czech	85	1.85	24.8356	1	0	0	0	0	B_Climbing	B_ambulance	B_almost.without	climber	1	0	0	0	0	0	0	0	0	0	0	0	0	0
ID338	300	100	0	20	20	0	0	0	0.681818	0.227273	0	0.0454545	0.0454545	0	0	0	440	0	0	1	female	29	Czech	56	1.61	21.6041	0	0	0	0	0	NA	NA	NA	NA	0	0	0	0	0	0	0	0	0	0	0	0	0	0
ID339	200	100	0	60	0	0	0	0	0.555556	0.277778	0	0.166667	0	0	0	0	360	3	2	1.66667	female	23	Czech	53	1.58	21.2306	1	0	0	0	0	B_Climbing	B_ambulance	A_without	climber	0	0	0	0	0	0	0	0	0	0	1	0	0	0
ID340	100	0	100	60	20	0	0	0	0.357143	0	0.357143	0.214286	0.0714286	0	0	0	280	1	1	2	female	18	Czech	80	1.8	24.6914	0	1	0	1	0	NA	B_ambulance	B_almost.without	others	0	0	0	0	0	0	0	0	0	0	0	0	0	1
ID341	0	300	0	20	0	0	0	0	0	0.9375	0	0.0625	0	0	0	0	320	1	1	2	female	29	Czech	50	1.63	18.8189	1	0	0	0	0	B_Climbing	B_ambulance	A_without	others	1	0	0	0	0	0	0	0	0	0	0	0	0	0
ID342	100	100	100	0	0	0	0	0	0.333333	0.333333	0.333333	0	0	0	0	0	300	1	1	2	female	28	Czech	73	1.73	24.3911	0	1	0	1	0	B_Climbing	B_ambulance	B_almost.without	others	1	0	0	0	0	0	0	0	0	0	0	0	0	0
ID343	450	450	0	120	120	90	0	0	0.365854	0.365854	0	0.097561	0.097561	0.0731707	0	0	1230	1	1	2	male	50	Czech	82	1.79	25.5922	0	1	0	1	0	B_Climbing	B_ambulance	B_almost.without	climber	1	0	0	0	0	0	0	0	0	0	0	0	0	0
ID344	0	0	0	20	20	0	0	0	0	0	0	0.5	0.5	0	0	0	40	1	0	1	male	21	Slovak	70	1.8	21.6049	0	1	0	1	0	B_Climbing	A_selfhelp	C_longlast	others	0	0	0	0	0	0	0	0	0	0	0	0	1	0
ID345	300	200	100	120	120	0	0	0	0.357143	0.238095	0.119048	0.142857	0.142857	0	0	0	840	0	0	1	male	17	Czech	62	1.72	20.9573	0	0	0	0	0	NA	NA	NA	NA	0	0	0	0	0	0	0	0	0	0	0	0	0	0
ID346	100	200	0	60	0	0	0	0	0.277778	0.555556	0	0.166667	0	0	0	0	360	1	1	3	female	35	Czech	68	1.64	25.2826	1	0	0	0	0	B_Climbing	C_hosp.short	B_almost.without	climber	0	0	0	0	1	0	0	0	0	0	0	0	0	0
ID347	100	0	200	0	0	0	0	0	0.333333	0	0.666667	0	0	0	0	0	300	3	3	2.66667	male	30	Czech	85	1.85	24.8356	1	0	0	0	0	B_Climbing	B_ambulance	B_almost.without	climber	0	0	0	0	0	0	0	0	0	0	1	0	0	0
ID348	450	450	450	120	12	0	0	0	0.303644	0.303644	0.303644	0.0809717	0.00809717	0	0	0	1482	3	0	1	male	31	Czech	88	1.91	24.1221	0	1	0	1	0	A_Approach	A_selfhelp	C_longlast	belaying	1	0	0	0	0	0	0	0	0	0	0	0	0	0
ID349	100	300	0	20	0	0	0	0	0.238095	0.714286	0	0.047619	0	0	0	0	420	2	0	1	female	34	Czech	66	1.76	21.3068	1	0	0	0	0	B_Climbing	A_selfhelp	A_without	climber	0	0	0	0	0	0	0	0	0	0	1	0	0	0
ID350	0	100	300	0	0	0	0	0	0	0.25	0.75	0	0	0	0	0	400	1	1	3	female	18	Czech	52	1.68	18.424	1	0	0	0	0	B_Climbing	D_hosp.long	B_almost.without	climber	1	0	0	0	0	0	0	0	0	0	0	0	0	0
ID351	0	100	100	0	0	0	0	0	0	0.5	0.5	0	0	0	0	0	200	2	1	1.5	male	32	Czech	62	1.73	20.7157	0	1	0	1	0	C_Descent	B_ambulance	B_almost.without	climber	0	1	0	0	0	0	0	0	0	0	0	0	0	0
ID352	300	0	200	0	0	0	0	0	0.6	0	0.4	0	0	0	0	0	500	0	0	1	male	29	Czech	72	1.83	21.4996	0	0	0	0	0	NA	NA	NA	NA	0	0	0	0	0	0	0	0	0	0	0	0	0	0
ID353	100	0	0	0	0	0	0	0	1	0	0	0	0	0	0	0	100	1	1	2	male	23	Czech	78	1.85	22.7904	0	0	0	0	1	C_Descent	B_ambulance	A_without	others	0	0	1	0	0	0	0	0	0	0	0	0	0	0
ID354	450	450	100	60	60	0	0	0	0.401786	0.401786	0.0892857	0.0535714	0.0535714	0	0	0	1120	1	0	1	female	60	Czech	58	1.57	23.5304	0	0	0	0	1	B_Climbing	A_selfhelp	A_without	climber	1	0	0	0	0	0	0	0	0	0	0	0	0	0
ID355	100	0	0	60	20	0	0	0	0.555556	0	0	0.333333	0.111111	0	0	0	180	0	0	1	male	28	Czech	70	1.76	22.5981	0	0	0	0	0	NA	NA	NA	NA	0	0	0	0	0	0	0	0	0	0	0	0	0	0
ID356	300	100	100	0	20	0	70	0	0.508475	0.169492	0.169492	0	0.0338983	0	0.118644	0	590	0	0	1	female	23	Slovak	78	1.7	22.4913	0	0	0	0	0	NA	NA	NA	NA	0	0	0	0	0	0	0	0	0	0	0	0	0	0
ID357	300	100	0	20	20	0	70	0	0.588235	0.196078	0	0.0392157	0.0392157	0	0.137255	0	510	1	1	2	female	36	Czech	75	1.65	27.55	0	0	0	0	1	B_Climbing	B_ambulance	B_almost.without	others	0	0	0	0	0	1	0	0	0	0	0	0	0	0
ID358	300	100	0	20	20	0	70	0	0.588235	0.196078	0	0.0392157	0.0392157	0	0.137255	0	510	1	1	2	male	43	Czech	75	1.76	24.21	0	0	0	0	1	B_Climbing	B_ambulance	B_almost.without	others	0	0	1	0	0	0	0	0	0	0	0	0	0	0
ID359	200	300	0	60	0	30	0	0	0.338983	0.508475	0	0.101695	0	0.0508475	0	0	590	1	0	1	female	28	Czech	59	1.72	19.9432	1	0	0	0	0	B_Climbing	A_selfhelp	A_without	climber	0	0	0	0	0	0	0	0	0	0	1	0	0	0
ID360	200	200	200	100	60	0	70	0	0.240964	0.240964	0.240964	0.120482	0.0722892	0	0.0843373	0	830	1	0	1	male	26	Czech	85	1.85	24.8356	0	0	1	0	0	A_Approach	A_selfhelp	A_without	climber	0	0	0	0	0	0	0	0	0	0	1	0	0	0
ID361	300	100	0	20	20	0	0	0	0.681818	0.227273	0	0.0454545	0.0454545	0	0	0	440	1	1	2	female	29	Czech	56	1.61	21.6041	1	0	0	0	0	B_Climbing	B_ambulance	B_almost.without	climber	1	0	0	0	0	0	0	0	0	0	0	0	0	0
ID362	200	100	0	60	0	0	0	0	0.555556	0.277778	0	0.166667	0	0	0	0	360	0	0	1	female	23	Czech	53	1.58	21.2306	0	0	0	0	0	NA	NA	NA	NA	0	0	0	0	0	0	0	0	0	0	0	0	0	0
ID363	100	0	100	60	20	0	0	0	0.357143	0	0.357143	0.214286	0.0714286	0	0	0	280	3	2	1.66667	female	18	Czech	80	1.8	24.6914	1	0	0	0	0	B_Climbing	B_ambulance	A_without	climber	0	0	0	0	0	0	0	0	0	0	1	0	0	0
ID364	0	300	0	20	0	0	0	0	0	0.9375	0	0.0625	0	0	0	0	320	1	0	1	female	29	Czech	50	1.63	18.8189	0	1	0	1	0	NA	NA	NA	others	0	0	0	0	0	0	0	0	0	0	0	0	0	1
ID365	100	100	100	0	0	0	0	0	0.333333	0.333333	0.333333	0	0	0	0	0	300	1	1	2	female	28	Czech	73	1.73	24.3911	1	0	0	0	0	B_Climbing	B_ambulance	A_without	others	1	0	0	0	0	0	0	0	0	0	0	0	0	0
ID366	450	450	0	120	120	90	0	0	0.365854	0.365854	0	0.097561	0.097561	0.0731707	0	0	1230	1	1	2	male	50	Czech	82	1.79	25.5922	0	1	0	1	0	B_Climbing	B_ambulance	B_almost.without	others	1	0	0	0	0	0	0	0	0	0	0	0	0	0
ID367	0	0	0	20	20	0	0	0	0	0	0	0.5	0.5	0	0	0	40	1	1	2	male	21	Slovak	70	1.8	21.6049	0	1	0	1	0	B_Climbing	B_ambulance	B_almost.without	climber	1	0	0	0	0	0	0	0	0	0	0	0	0	0
ID368	300	200	100	120	120	0	0	0	0.357143	0.238095	0.119048	0.142857	0.142857	0	0	0	840	1	0	1	male	17	Czech	62	1.72	20.9573	0	1	0	1	0	B_Climbing	A_selfhelp	C_longlast	others	0	0	0	0	0	0	0	0	0	0	0	0	1	0
ID369	100	200	0	60	0	0	0	0	0.277778	0.555556	0	0.166667	0	0	0	0	360	1	0	1	female	35	Czech	68	1.64	25.2826	0	1	0	1	0	B_Climbing	A_selfhelp	A_without	climber	0	0	0	0	0	0	0	0	0	0	1	0	0	0
ID370	100	0	200	0	0	0	0	0	0.333333	0	0.666667	0	0	0	0	0	300	1	1	3	male	30	Czech	85	1.85	24.8356	1	0	0	0	0	B_Climbing	C_hosp.short	B_almost.without	climber	0	0	0	0	1	0	0	0	0	0	0	0	0	0
ID371	450	450	450	120	12	0	0	0	0.303644	0.303644	0.303644	0.0809717	0.00809717	0	0	0	1482	3	3	2.66667	male	31	Czech	88	1.91	24.1221	1	0	0	0	0	B_Climbing	B_ambulance	B_almost.without	climber	0	0	0	0	0	0	0	0	0	0	1	0	0	0
ID372	100	300	0	20	0	0	0	0	0.238095	0.714286	0	0.047619	0	0	0	0	420	3	0	1	female	34	Czech	66	1.76	21.3068	0	1	0	1	0	A_Approach	A_selfhelp	C_longlast	belaying	1	0	0	0	0	0	0	0	0	0	0	0	0	0
ID373	0	100	300	0	0	0	0	0	0	0.25	0.75	0	0	0	0	0	400	2	0	1	female	18	Czech	52	1.68	18.424	1	0	0	0	0	B_Climbing	A_selfhelp	A_without	climber	0	0	0	0	0	0	0	0	0	0	1	0	0	0
ID374	0	100	100	0	0	0	0	0	0	0.5	0.5	0	0	0	0	0	200	1	1	3	male	32	Czech	62	1.73	20.7157	1	0	0	0	0	B_Climbing	D_hosp.long	B_almost.without	climber	1	0	0	0	0	0	0	0	0	0	0	0	0	0
ID375	300	0	200	0	0	0	0	0	0.6	0	0.4	0	0	0	0	0	500	4	2	1.5	male	29	Czech	72	1.83	21.4996	0	1	0	1	0	C_Descent	B_ambulance	B_almost.without	climber	0	1	0	0	0	0	0	0	0	0	0	0	0	0
ID376	100	0	0	0	0	0	0	0	1	0	0	0	0	0	0	0	100	0	0	1	male	23	Czech	78	1.85	22.7904	0	0	0	0	0	NA	NA	NA	NA	0	0	0	0	0	0	0	0	0	0	0	0	0	0
ID377	450	450	100	60	60	0	0	0	0.401786	0.401786	0.0892857	0.0535714	0.0535714	0	0	0	1120	1	1	2	female	60	Czech	58	1.57	23.5304	0	0	0	0	1	C_Descent	B_ambulance	A_without	others	0	0	1	0	0	0	0	0	0	0	0	0	0	0
ID378	100	0	0	60	20	0	0	0	0.555556	0	0	0.333333	0.111111	0	0	0	180	1	0	1	male	28	Czech	70	1.76	22.5981	0	0	0	0	1	B_Climbing	A_selfhelp	A_without	climber	1	0	0	0	0	0	0	0	0	0	0	0	0	0
ID379	300	100	100	0	20	0	70	0	0.508475	0.169492	0.169492	0	0.0338983	0	0.118644	0	590	0	0	1	female	21	Slovak	65	1.7	22.4913	0	0	0	0	0	NA	NA	NA	NA	0	0	0	0	0	0	0	0	0	0	0	0	0	0
ID380	100	450	0	20	20	30	0	0	0.16129	0.725806	0	0.0322581	0.0322581	0.0483871	0	0	620	0	0	1	female	34	Czech	58	1.62	22.1003	0	0	0	0	0	NA	NA	NA	NA	0	0	0	0	0	0	0	0	0	0	0	0	0	0
ID381	200	0	100	0	20	0	0	0	0.625	0	0.3125	0	0.0625	0	0	0	320	1	1	2	female	40	Czech	61	1.58	24.4352	0	1	0	1	0	A_Approach	B_ambulance	B_almost.without	others	0	0	0	0	0	1	0	0	0	0	0	1	0	0
ID382	100	200	100	20	20	0	0	0	0.227273	0.454545	0.227273	0.0454545	0.0454545	0	0	0	440	0	0	1	male	35	Czech	70	1.76	22.5981	0	0	0	0	0	NA	NA	NA	NA	0	0	0	0	0	0	0	0	0	0	0	0	0	0
ID383	56	0	0	0	0	0	0	0	1	0	0	0	0	0	0	0	56	1	0	1	male	22	Czech	72	1.7	24.9135	0	0	1	0	0	B_Climbing	A_selfhelp	A_without	others	0	0	0	0	0	0	1	0	0	0	0	0	0	0
ID384	450	0	0	0	0	0	0	0	1	0	0	0	0	0	0	0	450	1	1	2	female	18	Czech	56	1.72	18.9292	0	0	0	0	1	B_Climbing	B_ambulance	A_without	others	1	0	1	0	0	0	0	0	0	0	1	0	0	0
ID385	0	200	0	20	20	30	70	0	0	0.588235	0	0.0588235	0.0588235	0.0882353	0.205882	0	340	0	0	1	male	54	Czech	92	1.72	31.0979	0	0	0	0	0	NA	NA	NA	NA	0	0	0	0	0	0	0	0	0	0	0	0	0	0
ID386	450	450	200	60	20	0	70	0	0.36	0.36	0.16	0.048	0.016	0	0.056	0	1250	1	1	2	male	50	Czech	77	1.83	22.9926	0	0	0	0	1	A_Approach	B_ambulance	A_without	climber	0	0	0	0	0	0	0	0	0	0	0	1	0	0
ID387	100	450	0	60	60	30	70	0	0.12987	0.584416	0	0.0779221	0.0779221	0.038961	0.0909091	0	770	1	1	2	male	35	Czech	73	1.8	22.5309	1	0	0	0	0	B_Climbing	B_ambulance	B_almost.without	others	1	0	0	0	1	0	0	0	0	0	0	0	0	0
ID388	100	100	0	20	20	0	0	0	0.416667	0.416667	0	0.0833333	0.0833333	0	0	0	240	1	1	2	male	48	Czech	97	1.82	29.2839	0	1	0	1	0	B_Climbing	B_ambulance	A_without	climber	0	0	0	0	0	0	0	0	0	0	0	1	0	0
[truncated: 3 more columns]

## Sheet: Dataset metainfo
id	Participant ID
wall_h	Number of hours spent on indoor wall climbing per year
small.rocks_h	Number of hours spent on small rock climbing per year
boulder_h	Number of hours spent on bouldering per year
sport_h	Number of hours spent on sport climbing per year
traditional_h	Number of hours spent on traditional climbing per year
ice_h	Number of hours spent on ice climbing per year
peaks4_h	Number of hours spent on climbing peaks higher than 4 thousand meters above sea level per year
peaks8_h	Number of hours spent on climbing peaks higher than 8 thousand meters above sea level per year
wall_r	Proportion of time spent on indoor wall climbing
small.rocks_r	Proportion of time spent on small rock climbing
boulder_r	Proportion of time spent on bouldering
sport_r	Proportion of time spent on sport climbing
traditional_r	Proportion of time spent on traditional climbing
ice_r	Proportion of time spent on ice climbing
peaks4_r	Proportion of time spent on climbing peaks higher than 4 thousand meters above sea level
peaks8_r	Proportion of time spent on climbing peaks higher than 8 thousand meters above sea level
climbing.sum_h	Total number of climbing hours per year
inj	Incidence of injuries
midser.inj	Incidence of moderate and severe injuries
severity.inj	Severity of injuries
gender	Gender of participants
age	Age of participants
nationality	Nationality of participants
weight	Weight of participants
height	Height of participants
BMI	BMI of participants
boulder_inj	Occurrence of the last injury during bouldering
sport_inj	Occurrence of the last injury during sport climbing
wall_inj	Occurrence of the last injury during indoor wall climbing
small.rocks_inj	Occurrence of the last injury during small rocks climbing
others_inj	Occurrence of the last injury in other disciplines
phase	Phase of climbing during which injury occurred
treatment	Required level of injury treatment
consequences	Severity of injury consequences
mistake.cause	Cause of injury
	Body part injured in the last injury
A	ankle
B	lower back
C	sternum, ribs
D	upper back
E	elbow
F	foot
G	hip, groin
H	head, face
K	knee
N	neck, cervical spine
P	hand, finger, thumb
Q	lower leg, Achilles tendon
R	forearm
S	shoulder
T	thigh
U	upper arm
W	wrist
