# Supplementary material for: Analyzing Injury Patterns in Climbing: A Comprehensive Study of Risk Factors
Source: Sports (Basel). 2024 Feb 19;12(2):61. doi: 10.3390/sports12020061 (PMC10892067; doi:10.3390/sports12020061)
Supplement: Supplementary file 1 [file sports-12-00061-s001.zip › S2 supplementary analysis - data.xlsx]

## Sheet: List1
	Age	Height	Weight	BMI	Sex
wall_c	τ = -0.08, Padj = 0.049	τ = -0.04, Padj = 0.369	τ = -0.05, Padj = 0.317	τ = -0.04, Padj = 0.379	W = 16548.50, Padj = 0.998
small_r_c	τ = 0.11, Padj = 0.008	τ = -0.07, Padj = 0.185	τ = -0.04, Padj = 0.317	τ = 0.00, Padj = 0.970	W = 16762.50, Padj = 0.998
bould	τ = -0.15, Padj = 0.001	τ = 0.14, Padj = 0.004	τ = 0.04, Padj = 0.386	τ = -0.06, Padj = 0.170	W = 14026.50, Padj = 0.031
sport_c	τ = 0.09, Padj = 0.039	τ = -0.04, Padj = 0.369	τ = 0.01, Padj = 0.734	τ = 0.06, Padj = 0.170	W = 16509.50, Padj = 0.998
trad_c	τ = 0.12, Padj = 0.008	τ = 0.01, Padj = 0.841	τ = 0.09, Padj = 0.107	τ = 0.13, Padj = 0.012	W = 13638.50, Padj = 0.020
ice_c	τ = 0.16, Padj = 0.001	τ = 0.04, Padj = 0.369	τ = 0.07, Padj = 0.156	τ = 0.08, Padj = 0.170	W = 15278.00, Padj = 0.272
peaks4_c	τ = 0.03, Padj = 0.415	τ = 0.05, Padj = 0.369	τ = 0.11, Padj = 0.047	τ = 0.10, Padj = 0.064	W = 15202.00, Padj = 0.203
peaks8_c	τ = 0.09, Padj = 0.049	τ = 0.09, Padj = 0.135	τ = 0.09, Padj = 0.107	τ = 0.06, Padj = 0.198	W = 16317.00, Padj = 0.368
Table S4	The results of a correlation analysis using Kendall's method (τ) and the Wilcoxon test (W) between climbers' personal characteristics—Age, Height, Weight, BMI, and Sex—and the hours spent last year on various climbing disciplines. These disciplines include wall climbing (wall_c), small rock climbing (small_r_c), bouldering (bould), sport climbing (sport_c), traditional climbing (trad_c), ice clim…
Fig S5	Model estimation for the hours of climbing per year depending on the (a) age, (b) weight, (c) height, (d) BMI, (e) sex of climbers (mean ± 95% CI), with the color of the point corresponding to the individual climbing disciplines. These disciplines include wall climbing (wall_c), small rock climbing (small_r_c), bouldering (bould), sport climbing (sport_c), traditional climbing (trad_c), ice climb…
